## 25 **Summary**

26 The remodeling of neurons is a conserved fundamental mechanism underlying nervous system  
27 maturation and function. Glial cells are known to clear neuronal debris but also to have an  
28 active role in the remodeling process. Developmental axon pruning of *Drosophila* memory  
29 center neurons occurs by a degenerative process mediated by infiltrating astrocytes. However,  
30 how these glial processes are recruited by the axons is unknown. In an unbiased screen, we  
31 identified a new gene (*orion*) which is necessary for both the pruning of some axons and  
32 removal of the resulting debris. Orion is secreted from the neurons and bears some features  
33 common to the chemokines, a family of chemoattractant cytokines. Thus, chemokine  
34 involvement in neuron/glial cell interaction is an evolutionarily ancient mechanism. We  
35 propose that Orion is the neuronal signal that elicits astrocyte infiltration required for  
36 developmental neuronal remodeling.

37

38

## 39 **Introduction**

40 Neuronal remodeling is a widely used developmental mechanism, across the animal kingdom,  
41 to refine dendrite and axon targeting necessary for the maturation of neural circuits.  
42 Importantly, similar molecular and cellular events can occur during neurodevelopmental  
43 disorders or after nervous system injury<sup>1-4</sup>. A key role for glial cells in synaptic pruning and  
44 critical signaling pathways between glia and neurons have been identified<sup>4</sup>. In *Drosophila*, the  
45 mushroom body (MB), a brain memory center, is remodeled at metamorphosis and MB  $\gamma$   
46 neuron pruning occurs by a degenerative mechanism<sup>5-8</sup>. Astrocytes surrounding the MB have  
47 an active role in the process; blocking their infiltration into the MBs prevents remodeling<sup>9-12</sup>.  
48 MB  $\gamma$  neuron remodeling relies on two processes: axon fragmentation and the subsequent  
49 clearance of axonal debris. Importantly, it has been shown that astrocytes are involved in these  
50 two processes and that these two processes can be decoupled<sup>12</sup>. Altering the ecdysone signaling  
51 in astrocytes, during metamorphosis, results both in a partial axon pruning defect, visualized as  
52 either some individual larval axons or as thin bundles of intact larval axons remaining in the  
53 adults, and also in a strong defect in clearance of debris, visualized by the presence of clusters  
54 of axonal debris. Astrocytes have only a minor role in axon severing as evidenced by the  
55 observation that most of the MB  $\gamma$  axons are correctly pruned when ecdysone signaling is  
56 altered in these cells. When astrocyte function is blocked, the  $\gamma$  axon-intrinsic fragmentation  
57 process remains functional and the majority of axons degenerate.

58 It has been widely proposed that a “find-me/eat-me” signal emanating from the degenerating  $\gamma$   
59 neurons is necessary for astrocyte infiltration<sup>7,9,13</sup>. However, the nature of this glial recruitment  
60 signal is unknown.

61 Here we have identified a new gene (*orion*) by screening for viable ethyl  
62 methanesulfonate (EMS)-induced mutations and not for lethal mutations in MB clones as was  
63 done previously<sup>14,15</sup>. This allowed the identification of genes involved in glia cell function by  
64 directly screening for defects in MB axon pruning. We found that *orion*<sup>l</sup>, a viable X  
65 chromosome mutation, is necessary for both the pruning of some  $\gamma$  axons and removal of the  
66 resulting debris. We show that Orion is secreted from the neurons, remains near the axon  
67 membranes where it associates with infiltrating astrocytes, and is necessary for astrocyte  
68 infiltration into the  $\gamma$  bundle. This implies a role for an as-yet-undefined Orion receptor on the  
69 surface of the astrocytes. Orion bears some chemokine features, e.g, a CX<sub>3</sub>C motif, 3  
70 glycosaminoglycan binding consensus sequences that are required for its function. Altogether,  
71 our results identify a neuron-secreted extracellular messenger, which is likely to be the long-  
72 searched-for signal responsible for astrocyte infiltration and demonstrate its involvement for  
73 neuronal remodeling.

74

## 75 **Results and Discussion**

### 76 **The *orion* gene is necessary for MB remodeling**

77 Adult *orion*<sup>l</sup> individuals showed a clear and highly penetrant MB axon pruning phenotype as  
78 revealed by the presence of some adult unpruned vertical  $\gamma$  axons as well as the strong presence  
79 of debris (100% of mutant MBs; n = 100) (Fig. 1a, b, Table I and Supplementary Fig.1 and 2).  
80 Astrocytes, visualized with *alm-GAL4*, are the major glial subtype responsible for the  
81 clearance of the MB axon debris<sup>12</sup>. The presence of  $\gamma$  axon debris is a landmark of defective  
82 astrocyte function, as was previously described<sup>11,12</sup>, and is also further shown in this study  
83 (Supplementary Fig. 1a-d). The unpruned axon phenotype was particularly apparent during  
84 metamorphosis (Fig. 1c-h). At 24 h after puparium formation (APF), although  $\gamma$  axon branches  
85 were nearly completely absent in the wild-type control they persisted in the *orion*<sup>l</sup> mutant  
86 brains, where we also observed a significant accumulation of debris (Fig. 1e, h). The number  
87 of unpruned axons at this stage is lower in *orion*<sup>l</sup> than in *Hr39*<sup>C13</sup> where the  $\gamma$  axon-intrinsic  
88 process of pruning is blocked (Supplementary Fig. 1 e-g). In addition, the MB dendrite pruning  
89 was clearly affected in *orion*<sup>l</sup> individuals (Supplementary Fig. 1h-p).

90

### 91 **The *orion* gene encodes for a CX<sub>3</sub>C motif-containing secreted proteins**

92 The *orion*<sup>l</sup> EMS mutation was localized by standard duplication and deficiency mapping as  
93 well as by whole genome sequencing (Fig. 2a). The *orion* gene (CG2206) encodes two  
94 putatively secreted proteins: Orion-A (664 aa) and Orion-B (646 aa), whose mRNAs arise from  
95 two different promoters (Fig. 2b-d). We have confirmed that both mRNAs are present in early  
96 pupal brains by RT-PCR (data not shown). These two proteins differ in their N-terminal  
97 domains and are identical in the remainder of their sequences. The EMS mutation is a G to C  
98 nucleotide change inducing the substitution of the glycine (at position 629 for Orion-A and 611  
99 for Orion-B) into an aspartic acid. The mutation lies in the common shared part and therefore  
100 affects both Orion-A and -B functions. Both isoforms display a signal peptide at their N-termini  
101 suggesting that they are secreted. Interestingly, a CX<sub>3</sub>C chemokine signature is present in the  
102 Orion common region (Fig. 2b, c). Chemokines are a family of chemoattractant cytokines,  
103 characterized by a CC, CXC or CX<sub>3</sub>C motif, promoting the directional migration of cells within  
104 different tissues. Mammalian CX<sub>3</sub>CL1 (also known as fractalkine) is involved in, among other  
105 contexts, neuron-glia communication<sup>16-20</sup>. Mammalian Fractalkines display conserved  
106 intramolecular disulfide bonds that appear to be conserved with respect to their distance from the  
107 CX<sub>3</sub>C motif present in both Orion isoforms (Fig. 2c). Fractalkine and its receptor, CX<sub>3</sub>CR1,  
108 have been recently shown to be required for post-trauma cortical brain neuron microglia-  
109 mediated remodeling in a mouse whisker lesioning paradigm<sup>21</sup>. We observed that the change  
110 of the CX<sub>3</sub>C motif into CX<sub>4</sub>C or AX<sub>3</sub>C blocked the Orion function necessary for the MB  
111 pruning (Supplementary Fig. 3a-c, h-j). Similarly, the removal of the signal peptide also  
112 prevented pruning (Supplementary Fig. 3d, h-j). These two results indicate that the Orion  
113 isoforms likely act as secreted chemokine-like molecules. We also produced three  
114 CRISPR/Cas9-mediated mutations in the *orion* gene, which either delete the common part  
115 (*orion*<sup>ΔC</sup>), the A-specific part (*orion*<sup>ΔA</sup>) or the B-specific part (*orion*<sup>ΔB</sup>). Noticeably, *orion*<sup>ΔC</sup>  
116 displayed the same MB pruning phenotype as *orion*<sup>l</sup> which is also the same in *orion*<sup>l</sup>/*Deficiency*  
117 females indicating that *orion*<sup>l</sup> and *orion*<sup>ΔC</sup> are likely null alleles for this phenotype. In contrast,  
118 *orion*<sup>ΔA</sup> and *orion*<sup>ΔB</sup> have no MB phenotype by themselves indicating the likelihood of  
119 functional redundancy between the two proteins in the pruning process (Supplementary Fig. 4).

120

### 121 **Orion is required and expressed by MB $\gamma$ axons**

122 Using the GAL4/UAS system<sup>22</sup>, we found that expression of wild-type *orion* in the *orion*<sup>l</sup> MB  
123  $\gamma$  neurons (*201Y-GAL4*) fully rescued the MB mutant phenotype (100% of wild-type MBs n =  
124 387; see quantitation in Supplementary Fig. 3h) although wild-type *orion* expression in the  
125 astrocytes (*alrm-GAL4*) did not rescue (Fig. 1i-k and Supplementary Fig. 5a-c). *repo-GAL4*

126 could not be used because of lethality when combined with *UAS-orion*. This supports the  
127 hypothesis that Orion is produced by axons and, although necessary for astrocyte infiltration,  
128 not by astrocytes. Both *UAS-orion-A* and *UAS-orion-B* rescued the *orion<sup>l</sup>* pruning phenotype  
129 indicating again a likely functional redundancy between the two proteins at least in the pruning  
130 process. Complementary to the rescue results, we found that the expression of an *orion*-  
131 targeting RNAi in the MBs produced unpruned axons similar to that in *orion<sup>l</sup>* although debris  
132 are not apparent likely due to an incomplete inactivation of the gene expression by the RNAi  
133 (Fig. 11 and Supplementary Fig. 5d). The expression of the same RNAi in the glia had no effect  
134 (Supplementary Fig. 5e). Using the mosaic analysis with a repressible cell marker (MARCM  
135 <sup>23</sup>), we found that *orion<sup>l</sup>* homozygous mutant neuroblast clones of  $\gamma$  neurons, in *orion<sup>l/+</sup>*  
136 phenotypically wild-type individuals, were normally pruned (Supplementary Fig. 6a, b).  
137 Therefore, *orion<sup>l</sup>* is a non-cell-autonomous mutation which is expected since the Orion proteins  
138 are secreted (see below). Orion proteins secreted by the surrounding wild-type axons rescue the  
139 pruning defects in the *orion* mutant clones.

140 From our genetic data, *orion* expression is expected in the  $\gamma$  neurons. The fine temporal  
141 transcriptional landscape of MB  $\gamma$  neurons was recently described and a corresponding resource  
142 is freely accessible<sup>24</sup>. Noteworthy, *orion* is transcribed at 0h APF and dramatically decreases at  
143 9h APF with a peak at 3h APF (Supplementary Fig. 7). The nuclear receptors *EcR-B1* and its  
144 target *Sox14* are key transcriptional factors required for MB neuronal remodeling<sup>6,7</sup>. *orion* was  
145 found to be a likely transcriptional target of EcR-B1 and Sox14 <sup>24</sup> and this is also consistent  
146 with earlier microarray analysis observations<sup>25</sup>. Noticeably, forced expression of *UAS-EcR-B1*  
147 in the MBs did not rescue the *orion* mutant phenotype and EcR-B1 expression, in the MB  
148 nuclei, is not altered in *orion<sup>l</sup>* individuals (Supplementary Fig. 6c, f). Furthermore, the  
149 unpruned axon phenotype produced by *orion* RNAi is rescued by forced expression of *EcR-B1*  
150 in the MBs (Supplementary Fig. 3h). Therefore, our genetic interaction analyses support *orion*  
151 being downstream of *EcR-B1*.

152

### 153 **Orion is secreted by MB $\gamma$ axons**

154 We focused our further molecular and cellular work on Orion-B alone since a functional  
155 redundancy between the two isoforms was apparent. We expressed the Orion-B protein in the  
156  $\gamma$  neurons using an *UAS-orion-B-Myc* insert and the *201Y-GAL4* driver. Orion-B was seen along  
157 the MB lobes and at short distances away from the axons as visualized by anti-Myc staining  
158 (Fig. 3). In addition, anti-Myc staining was particularly clear at the tip of the lobes indicating  
159 the secretion of Orion-B (Fig. 3a, d, g, j, k). Synaptic terminals are condensed in the  $\gamma$  axon

160 varicosities that disappear progressively during remodeling and hole-like structures  
161 corresponding to the vestiges of disappeared varicosities can be observed at 6 h APF<sup>9</sup>. We noted  
162 the presence of secreted Myc-labelled Orion-B inside these hole-like structures (Fig. 3b, e, h).  
163 The secretion of the Orion proteins should be under the control of their signal peptide and  
164 therefore, Orion proteins lacking their signal peptide ( $\Delta$ SP) should not show this “secretion”  
165 phenotype. When *UAS-orion-B-Myc- $\Delta$ SP* was expressed, Orion-B was not observed outside of  
166 the axons or in the hole-like structures (Fig. 3c, f, i). We also excluded the possibility that this  
167 “secretion” phenotype was due to some peculiarities of the Myc labelling by using a *UAS-drl-*  
168 *Myc* construct<sup>26</sup>. Drl is a membrane-bound receptor tyrosine kinase and Drl-Myc staining,  
169 unlike Orion-B, was not observed outside of the axons or in the hole-like structures  
170 (Supplementary Fig. 6g-l). Finally, the presence of Myc-labelled Orion-B secreted protein not  
171 associated with GFP-labelled axon membranes can be observed outside of the  $\gamma$  axon bundle in  
172 3D reconstructing images (Fig. 3j, k).

173

#### 174 **Orion is required for the infiltration of astrocytes into the MB $\gamma$ bundle**

175 Since glial cells are likely directly involved in the *orion*<sup>1</sup> pruning phenotype, we examined their  
176 behavior early during the pruning process. At 6 h APF the axon pruning process starts and is  
177 complete by 24 h APF but the presence of glial cells in the vicinity of the wild-type  $\gamma$  lobes is  
178 already clearly apparent at 6 h APF<sup>9</sup>. We examined glial cells visualized by a membrane-  
179 targeted GFP (*UAS-mGFP*) under the control of *repo-GAL4* and co-stained the  $\gamma$  axons with  
180 anti-Fas2. At 6 h APF a striking difference was noted between wild-type and *orion*<sup>1</sup> brains.  
181 Unlike in the wild-type control, there is essentially no glial cell invasion of the  $\gamma$  bundle in the  
182 mutant (Fig. 4a-c). Interestingly, glial infiltration was not observed in *orion*<sup>1</sup> neither at 12 h  
183 APF nor at 24 h APF (Supplementary Fig. 8 a-h) suggesting that glial cells never infiltrate MBs  
184 in mutant individuals. We also ruled out the possibility that this lack of glial cell infiltration  
185 was due to a lower number of astrocytes in mutant versus wild-type brains (Supplementary Fig.  
186 8i, j).

187 We also examined the proximity between MB-secreted Orion-Myc and astrocytes, as  
188 inferred from the shape of the glial cells, labelled with the anti-Drpr antibody at 6 h APF (Fig.  
189 4d-f). We looked at the distribution along the vertical  $\gamma$  lobes (60  $\mu$ m of distance, see Methods)  
190 of Orion-B-Myc (secreted) and of Orion-B- $\Delta$ SP-Myc (not secreted), in an otherwise wild-type  
191 background. We quantified only from images where an astrocyte sat on the top of the vertical  
192 lobe. A peak of Orion-Myc localization was always found (n = 10) in the region close to the  
193 astrocyte (less than 7  $\mu$ m) when secreted Orion-B-Myc was quantified (Fig. 4g, i). However,



194 this was not the case ( $n = 9$ ) when Orion-B- $\Delta$ SP-Myc was quantified (Fig. 4h, j). This strongly  
195 suggests that astrocytic processes may be “attracted” by secreted Orion.

196 Moreover, we observed that secreted Orion stays close to axon membranes  
197 (Supplementary Fig. 9a-f). Protein, in particular chemokine, localization to membranes is often  
198 mediated by glycosaminoglycans (GAGs), a family of highly anionic polysaccharides that  
199 occur both at the cell surface and within the extracellular matrix. GAGs, to which all  
200 chemokines bind, ensure that these signaling proteins are presented at the correct site and time  
201 in order to mediate their functions<sup>27</sup>. We identified three consensus sequences for GAG linkage  
202 in the common part of Orion (Fig. 2d). We mutated these sequences individually and assayed  
203 the mutant proteins for their ability to rescue the *orion*<sup>1</sup> pruning deficit *in vivo*. The three GAG  
204 sites are required for full Orion function, although mutating only GAG3 produced a strong  
205 mutant phenotype (Supplementary Fig. 3e-j).

206 Our findings imply a role for an as-yet-undefined Orion receptor on the surface of the  
207 glial cells. The glial receptor *draper* (*drpr*) seemed an obvious candidate<sup>13,28-30</sup>, although Drpr  
208 ligands unrelated to Orion have been identified<sup>31,32</sup>. The MB remodeling phenotypes in *orion*<sup>1</sup>  
209 and *drpr* <sup>$\Delta$ 5</sup> are, however, different; only *orion*<sup>1</sup> displayed unpruned axons and the *drpr* mutant  
210 phenotype does not persist throughout adulthood<sup>13</sup> (Table I and Supplementary Fig. 1).  
211 Strikingly, using *UAS-mGFP* driven by *201Y-GAL4*, instead of *Fas2*, where the labelling of  $\alpha\beta$   
212 axons often masks individual unpruned  $\gamma$  axons, allowed us to observe occasionally unpruned  
213 axons in *drpr* <sup>$\Delta$ 5</sup> one-week-old post-eclosion brains (Table I and Supplementary Fig. 2)  
214 indicating a certain degree of undescribed axon persistence in the mutant background. In  
215 addition, our data indicate that Orion does not induce the Drpr signaling pathway  
216 (Supplementary Fig. 10). This suggests that Drpr is not an, or at least not the sole, Orion  
217 receptor.

218 We have uncovered a neuronally-secreted chemokine-like protein acting as a “find-  
219 me/eat-me” signal involved in the neuron-glia crosstalk required for axon pruning during  
220 developmental neuron remodeling. To the best of our knowledge, chemokine-like signaling in  
221 insects was not described previously and furthermore our results point to an unexpected  
222 conservation of chemokine CX<sub>3</sub>C signaling in modulation of neural circuits.

223

## 224 **Methods**

### 225 **Drosophila stocks**

226 All crosses were performed using standard culture medium at 25 °C. Except where otherwise  
227 stated, alleles have been described previously (<http://flystocks.bio.indiana.edu>). The following

228 alleles were used. *orion<sup>l</sup>*, *orion<sup>ΔA</sup>*, *orion<sup>ΔB</sup>* and *orion<sup>ΔC</sup>* were generated in this study. *drpr<sup>Δ5rec8</sup>*  
229 was found to have an unlinked lethal mutation which was removed by standard mitotic  
230 recombination over a wild-type chromosome<sup>28,29</sup>. Animals bearing this version of *drpr<sup>Δ5</sup>*  
231 survive to adult stages and were used for this work. The following transgenes were used. *UAS-*  
232 *orion-RNAi* (VDRC stock 30843) and 2x *UAS-drl-myc<sup>26</sup>*, *10X-Stat92E-GFP<sup>33</sup>*. *UAS-orion-A*,  
233 *UAS-orion-A-myc*, *UAS-orion-B*, *UAS-orion-B-myc*, *UAS-orion-B-Mut AX3C-myc*, *UAS-*  
234 *orion-B-Mut CX4C-myc*, *UAS-orion-B-ΔSP-myc*, *UAS-orion-B-Mut GAG1-myc*, *UAS-orion-B-*  
235 *Mut GAG2-myc* and *UAS-orion-B-Mut GAG3-myc* were generated in this study. We used three  
236 GAL4 lines: *201Y-GAL4* expressed in  $\gamma$  MB neurons, *alrm-GAL4* expressed exclusively in glial  
237 astrocytes<sup>34</sup> and the pan-glial driver *repo-GAL4* expressed in all glia<sup>35</sup>.

238

### 239 **Mutagenesis and screening**

240 EMS mutagenesis was carried out following the published procedure<sup>36</sup>. EMS treated *y w<sup>67c23</sup>*  
241 *sn<sup>3</sup> FRT19A* males were crossed to *FM7c/ph<sup>0</sup> w* females and stocks, coming from single *y w<sup>67c23</sup>*  
242 *sn<sup>3</sup> FRT19A/ FM7c* female crossed to *FM7c* males, were generated. Only viable *y w<sup>67c23</sup> sn<sup>3</sup>*  
243 *FRT19A* chromosome bearing stocks were kept and *y w<sup>67c23</sup> sn<sup>3</sup> FRT19A; UAS-mCD8-GFP*  
244 *201Y-GAL4* /+ adult males from each stock were screened for MB neuronal remodeling defect  
245 with an epi-fluorescence microscope (Leica DM 6000).

246

### 247 **Mapping of *orion***

248 To broadly map the location of the EMS-induced mutation on the X chromosome we used  
249 males from the stocks described in the X-chromosome duplication kit (Bloomington Stock  
250 Center) that we crossed with *orion<sup>l</sup>; UAS-mCD8-GFP 201Y-GAL4* females. Dp(1; Y)BSC346  
251 (stock 36487) completely rescued the *orion<sup>l</sup>*  $\gamma$  axon unpruned phenotype. This duplication is  
252 located at 6D3-6E2; 7D18 on the X chromosome. We then used smaller duplications covering  
253 this region. Thus, duplications Dp(1 ;3)DC496 (stock 33489) and Dp(1;3)DC183 (stock 32271)  
254 also rescued the *orion<sup>l</sup>* mutant phenotype. However duplication Dp(1;3)DC184 (stock 30312)  
255 did not rescue the mutant phenotype. Overlapping of duplications indicates that the EMS  
256 mutation was located between 7C9 and 7D2 which comprises 72 kb. In addition, deficiency  
257 Def(1)C128 (stock 949, Bloomington Stock Center) which expand from 7D1 to 7D5-D6  
258 complements *orion<sup>l</sup>* contrarily to deficiency Def(1)BSC622 (stock 25697, Bloomington Stock  
259 Center ) which does not (see Fig. 2a). We named this gene *orion* since the debris present in  
260 mutant MBs resembles a star constellation.

261



## 262 **Whole-Genome Sequencing**

263 Gene mutation responsible for the unpruned  $\gamma$  axon phenotype was precisely located through  
264 the application of next generation sequencing. Genomic DNA was extracted from 30 adult  
265 females (mutant and control) and directly sequenced on a HiSeq2000 next-generation  
266 sequencing platform (Illumina). Bioinformatics analysis for read alignment and variant  
267 investigation was carried out through the 72 kb selected by duplication mapping (see above) at  
268 the University of Miami Miller School of Medicine, Center for Genome Technology.

269

## 270 **Signal peptide and transmembrane protein domain research**

271 For prediction of signal peptide sequences, we used the PrediSi website<sup>37</sup>:  
272 <http://www.predisi.de>; for transmembrane domains, we used the TMHMM Server, v 2.0<sup>38</sup>:  
273 <http://www.cbs.dtu.dk/services/TMHMM/>

274

## 275 **Orion and fractalkine alignments**

276 The sequence of the region common to both Orion isoforms containing the CX<sub>3</sub>C motifs and  
277 the likely conserved CX<sub>3</sub>C-downstream cysteines and those of the human, mouse and chicken  
278 fractalkine were aligned using the AlignX plug-in in the VectorNTi software package  
279 (InVitrogen) without permitting introduction of spaces or deletions.

280

## 281 **GAG binding site research**

282 Identification of GAG binding sites in proteins, in absence of structural data, is complicated by  
283 the diversity of both GAG structure and GAG binding proteins. Previous work based on  
284 heparin-binding protein sequence comparisons led to the proposition of two GAG binding  
285 consensus sequences, the XBBXBX and XBBBXXBX motifs (where B and X stand for basic  
286 and neutral/hydrophobic amino acids respectively). A number of closely related basic clusters,  
287 including XBBXBXB were next experimentally identified<sup>39</sup>. Visual examination of the  
288 Orion-B sequences returned three such clusters (XBBXXBXXBXXBX: residues 242-254;  
289 XBBXBX: residues 416-421 and XBBXBXBX: residues 547-554, numbering includes the  
290 peptide signal see Fig. 2d), which are also present in Orion-A.

291

## 292 **CRISPR-Cas9 strategy**

293 All guide RNA sequences (sgRNA) were selected using the algorithm  
294 [targetfinder.flycrispr.neuro.brown.edu/](http://targetfinder.flycrispr.neuro.brown.edu/) containing 20 nucleotides each (PAM excluded) and  
295 are predicted to have zero off-targets. We selected three pairs of sgRNA. Each pair is targeting

296 either the A specific region of *orion*, the B specific region of *orion* or the C common region of  
297 the two isoforms. We used the following oligonucleotide sequences:

298 CRISPR-1 orion A fwd :

299 TATATAGGAAAGATATCCGGGTGAACTTCATTTGCGTTTTGATTTTCAGGTTTTAG

300 AGCTAGAAATAGCAAG

301 CRISPR-1 orion A rev :

302 ATTTTAACTTGCTATTTCTAGCTCTAAAACGCTGTTGGAGTAGATTGGTGGACGTT

303 AAATTGAAAATAGGTC

304 CRISPR-1 orion B fwd :

305 TATATAGGAAAGATATCCGGGTGAACTTCGTGAAATCTCAGCTGTATCGGTTTTA

306 GAGCTAGAAATAGCAAG

307 CRISPR-1 orion B rev :

308 ATTTTAACTTGCTATTTCTAGCTCTAAAACGCTAGATTTAAAACGGCAAGGACGTT

309 AAATTGAAAATAGGTC

310 CRISPR-1 orion commun region C fwd :

311 TATATAGGAAAGATATCCGGGTGAACTTCACCTGGTAAAGAATGCCAGAGTTTTA

312 GAGCTAGAAATAGCAAG

313 CRISPR-1 orion commun region C rev :

314 ATTTTAACTTGCTATTTCTAGCTCTAAAACCTTCGCGTCCAGGTGAGTCTGACGTT

315 AAATTGAAAATAGGTC

316 We introduced two sgRNA sequences into pCFD4<sup>40</sup>, a gift from Simon Bullock (Addgene  
317 plasmid # 49411) by Gibson Assembly (New England Biolabs) following the detailed protocol  
318 at [crisprflydesign.org](http://crisprflydesign.org). For PCR amplification, we used the protocol described on that website.  
319 Construct injection was performed by Bestgene (Chino Hills, CA) and all the transgenes were  
320 inserted into the same attP site (VK00027 at 89E11). Transgenic males expressing the different  
321 *orion* sgRNAs were crossed to *y nos-Cas9 w\** females bearing an isogenized X chromosome.  
322 100 crosses were set up for each sgRNA pair, with up to 5 males containing both the sgRNAs  
323 and *nos-Cas9*, and 5 *FM7c/ph<sup>0</sup> w* females. From each cross, a single *y nos-Cas9 w\* /FM7c*  
324 female was crossed with *FM7c* males to make a stock which was validated for the presence of  
325 an indel by genomic PCR with primers flanking the anticipated deletion and the precise  
326 endpoints of the deletion were determined by sequencing (Genewiz, France) using *orion*  
327 specific primers.

328

### 329 **Adult brain dissection, immunostaining and MARCM mosaic analysis**

330 Adult fly heads and thoraxes were fixed for 1 h in 3.7% formaldehyde in PBS and brains were  
331 dissected in PBS. For larval and pupal brains, brains were first dissected in PBS and then fixed  
332 for 15 min in 3.7% formaldehyde in PBS. They were then treated for immunostaining as  
333 previously described<sup>23,41</sup>. Antibodies, obtained from the Developmental Studies Hybridoma  
334 Bank, were used at the following dilutions: Mouse monoclonal anti-Fas2 (1D4) 1:10, mouse  
335 monoclonal anti-Draper (8A1), 1:400 and mouse monoclonal anti-Repo (8D1.2) 1:10. Mouse  
336 monoclonal primary antibody against EcR-B1 (AD4.4) was used at 1:5.000<sup>42</sup>. Polyclonal  
337 mouse (Abcam, (9E10) ab32) and Rabbit (Cell Signaling 7D10) anti-Myc antibodies were used  
338 at 1: 1000 and 1: 500, respectively. Goat secondary antibodies conjugated to Cy3, Alexa 488  
339 and Cy5 against mouse or rabbit IgG (Jackson ImmunoResearch laboratory) were used at 1:300  
340 for detection. To generate clones in the MB, we used the Mosaic Analysis with a Reversible  
341 Cell Marker (MARCM) technique<sup>23</sup>. First instar larvae were heat-shocked at 37°C for 1 h. Adult  
342 brains were fixed for 15 min in 3,7% formaldehyde in PBS before dissection and GFP  
343 visualization.

344

### 345 **Microscopy and image processing**

346 Images were acquired at room temperature using a Zeiss LSM 780 laser scanning confocal  
347 microscope (MRI Platform, Institute of Human Genetics, Montpellier, France) equipped with a  
348 40x PLAN apochromatic 1.3 oil-immersion differential interference contrast objective lens.  
349 The immersion oil used was Immersol 518F. The acquisition software used was Zen 2011  
350 (black edition). Contrast and relative intensities of the green (GFP), of the red (Cy3) and of the  
351 blue (Cy5 and Alexa 488) channels were processed with ImageJ and Fiji software. Settings  
352 were optimized for detection without saturating the signal. For each set of figures settings were  
353 constants. However, since the expression of the Orion-B-Myc- $\Delta$ SP protein is lower than the  
354 one of the Orion-B-Myc (as shown in the western blot and its quantitation Supplementary Fig.  
355 3 i-j), the levels of red were increased in this particular case in order to get similar levels than  
356 in Orion-B-Myc. We used the Imaris (Bitplane) software to generate a pseudo-3D structure of  
357 Orion-secreting  $\gamma$  axons (Imaris surface tool). We created two 3D surfaces, from regular  
358 confocal images, defining the axonal domain (green) and the Orion secretion domain (red).

359

### 360 **Quantitation of immunolabelling**

361 To quantify unpruned  $\gamma$  axons we established three categories of phenotypes: “none”, when no  
362 unpruned axons are observed, “weak”, when few unpruned individual axons or thin axon

363 bundles are observed in the dorsal lobe and “strong”, when >50% of the axons are unpruned.  
364 In this last category, the percentage of unpruned axons is estimated by the width of the  
365 corresponding medial bundle compared with the width of the medial pruned axon bundle<sup>41</sup>. For  
366 debris quantification we established five categories : none, scattered dots, mild, intermediary  
367 and strong based on the location and size of the debris clusters<sup>11</sup>. In  $\geq$  one-week-old adults,  
368 “none” means absence of debris. In  $\leq$  two-hours-old adults “scattered dots” means some  
369 individual debris can be observed. We considered “mild”, if debris clusters (clusters  $> 5 \mu\text{m}^2$ )  
370 appear only at one location, “intermediary”, at two locations and “strong” at three locations of  
371 the MB. Three debris locations were considered: the tip of the vertical lobe, the tip of the medial  
372 lobe and around the heel (bifurcation site of  $\gamma$  axons into dorsal and medial).  
373 For EcR-B1 signal quantitation, we performed 5 measurements for each picture (Intensity 1,...,  
374 5) in the nuclei of GFP positive cell bodies and the same number of measurements in  
375 background using confocal single slices. The mean of these background measurements is called  
376 mean background. We then subtracted intensities of mean background from each intensity value  
377 (Intensity 1,...,5 minus mean background) to obtain normalized intensity values. Finally, we  
378 compared normalized intensity values between two genetic conditions. We proceeded similarly  
379 for Draper and STAT-GFP signal quantitation, but staining was quantified in the astrocyte  
380 cytoplasm located in the immediate vicinity of the  $\gamma$  dorsal lobe. Quantitation of intensity was  
381 performed using ImageJ software.

382 To quantify the Myc signal in the  $\gamma$  vertical lobe, we traced a 60  $\mu\text{m}$  line on the Cy3 red  
383 Z-stack and used the Plot Profile function of ImageJ to create a plot of intensity values across  
384 the line. The top of the line (0  $\mu\text{m}$ ) was located at the tip of the  $\gamma$  vertical lobe and the bottom  
385 of the line (60  $\mu\text{m}$ ) at the branching point of the two  $\gamma$  lobes. Only images containing an  
386 astrocyte sitting at the top of the  $\gamma$  vertical lobe were used to quantify Myc expression levels in  
387 *orion-B* and *orion-B- $\Delta$ SP* expressing MBs.

388 To quantify the number of astrocytes around the  $\gamma$  lobes, we counted the number of glial  
389 nuclei, as labelled with anti-Repo antibody, contained in GFP-positive astrocyte cytoplasm  
390 labelled with *UAS-mCD8-GFP* driven by *alrm-GAL4*. We only counted nuclei contained within  
391 a circle of 70  $\mu\text{m}$  of diameter centered in the middle of the vertical  $\gamma$  lobe tips.

392

### 393 **UAS constructs**

394 The *orion-A cDNA* inserted in the pOT2 plasmid (clone LD24308) was obtained from Berkeley  
395 Drosophila Genome Project (BDGP). Initial *Orion-B cDNA* as well as the *Orion-B cDNAs*

396 containing mutations at the CX<sub>3</sub>C and the GAG sites or lacking the signal peptide were  
397 produced at GenScript (Piscataway, NJ) in the pcDNA3.1-C-(k)DYK vector. The *Orion-B*  
398 *cDNAs* contained the following mutations:

399 To remove the signal peptide, we removed sequence: GCGCCGCCTTTCGGATTATTAGCTGCT  
400 GTTGTGCTGTTCTTGTACGCTTGTGATTTGTGGAAATA located after the first ATG.

401 At the CX<sub>3</sub>C site: In AX<sub>3</sub>C we exchanged TGC to GCC. In CX<sub>4</sub>C, we added an additional Ala  
402 (GCC) to get CAX<sub>3</sub>C.

403 To mutate the putative GAG binding sites we exchanged Lys and Arg by Ala at the  
404 corresponding sites: **AAGAGGACGGAACGCACACTAAAATACTCAAG**;

405 **AAGCGCAACCGA** and **CGCAGGGAGAACTGCGT** to

406 **GCCGCCACGGAAGCCACACTAGCCATACTCAAG**,

407 **GCCGCCAACGCC** and **GCCGCCGAGGCCCTGGCC** respectively for mutations in GAG1,

408 GAG2 and GAG3.

409 The different constructs were amplified by PCR using forward primers containing  
410 sequences CACCaaaacATG (where ATG encodes the first Methionine) followed by the  
411 specific *orion-A* or *orion-B cDNA* sequences and including or not nucleotides corresponding to  
412 the STOP codon at the reverse primers resulting in transgenes without and with a MYC-tag  
413 respectively.

414 To amplify orion-A we used as forward primers (F):

415 F: CACCAAAACATGGAGATTTATAAATTGGGTACTTCCCCT

416 To amplify orion-B we used:

417 F: CACCAAAACATGGCGCCGCCTTTCGGATTATTA

418 For both we used the same reverse oligonucleotide (R):

419 R containing stop: TTAGAATCTATTCTTTGGCACCTGAACGT

420 R without stop: GAATCTATTCTTTGGCACCTGAACGT

421 Amplified cDNA was processed for pENTR/D-TOPO cloning (ThermoFisher  
422 Scientific, K240020) and constructs were subsequently sequenced (Genewiz, France). We used  
423 the Gateway LR clonase enzyme mix (ThermoFisher Scientific, 11791019) to recombine the  
424 inserts into the destination UAS vector pJFRC81-GW-2xMyc (L. G. F., unpublished) which  
425 was generated from pJFRC81-10XUAS-IVS-Syn21-GFP-p10 (Addgene plasmid 36462  
426 deposited by G. Rubin<sup>43</sup>) by replacing the GFP ORF with a Gateway cassette adding on a C-  
427 terminal 2x Myc tag. *orion-A*, *orion-B* and Myc-tagged constructs (*orion A*, *orion B*, and *orion-*  
428 *B mutants*) transgenic fly lines (UASs) were generated at BestGene and all the transgenes were  
429 inserted into the same attP site (VK00027 in 89E11). All the crosses involving the UAS-GAL4

430 system were performed at 25°C except for *UAS-orion-A* and *201Y-GAL4* which were performed  
431 at 18°C.

432

### 433 **Western analysis**

434 Five larval heads were homogenized in an Eppendorf tube containing 20 µl of 3X sample buffer  
435 (2% SDS, 0.125 M Tris-HCl pH 6.9, 5% β-mercaptoethanol, 20% glycerol, bromophenol blue)  
436 and proteins were separated by SDS-PAGE. After electrotransfer to nitrocellulose, the blot was  
437 blocked in PBS, 0.5% Tween-20, 5% milk. The Orion-Myc and Tubulin proteins were detected  
438 using a mouse anti-Myc antibody (clone 9E10, AbCam) and an anti-Tubulin antibody (Sigma,  
439 T5168) at 1/1000 and 1/10.000 respectively in PBS, 0.5% Tween-20, 5% milk and revealed  
440 using anti-mouse Ig horseradish peroxidase (1:10.000) and an ECL kit (Amersham). Band  
441 intensities were normalized to the corresponding tubulin band intensity using the ImageJ  
442 software.

443

### 444 **Statistics**

445 Comparison between two groups expressing a qualitative variable was analyzed for statistical  
446 significance using the Fisher's exact test for a 2x3 contingency table  
447 (<https://www.danielsoper.com/statcalc/calculator.aspx?id=58>). Comparison of two groups  
448 expressing a quantitative variable was analyzed using the two-tailed non-parametric Mann-  
449 Whitney *U* test (<https://www.socscistatistics.com/tests/mannwhitney/Default2.aspx>). Values of  
450  $p < 0.05$  were considered to be significant. Graphs were performed using the GraphPad Prism  
451 software (version 8.1.1).

452

### 453 **References**

- 454 1 Luo, L. & O'Leary, D. D. Axon retraction and degeneration in development and disease.  
455 *Annu Rev Neurosci* **28**, 127-156 (2005).
- 456 2 Neukomm, L. J. & Freeman, M. R. Diverse cellular and molecular modes of axon  
457 degeneration. *Trends Cell Biol* **24**, 515-523, doi:10.1016/j.tcb.2014.04.003 (2014).
- 458 3 Schuldiner, O. & Yaron, A. Mechanisms of developmental neurite pruning. *Cell Mol Life*  
459 *Sci* **72**, 101-119, doi:10.1007/s00018-014-1729-6 (2015).
- 460 4 Neniskyte, U. & Gross, C. T. Errant gardeners: glial-cell-dependent synaptic pruning  
461 and neurodevelopmental disorders. *Nat Rev Neurosci* **18**, 658-670,  
462 doi:10.1038/nrn.2017.110 (2017).
- 463 5 Watts, R. J., Hoopfer, E. D. & Luo, L. Axon pruning during *Drosophila* metamorphosis:  
464 evidence for local degeneration and requirement of the ubiquitin-proteasome system.  
465 *Neuron* **38**, 871-885 (2003).



- 466 6 Yu, F. & Schuldiner, O. Axon and dendrite pruning in *Drosophila*. *Curr Opin Neurobiol*  
467 **27**, 192-198, doi:10.1016/j.conb.2014.04.005 (2014).
- 468 7 Boulanger, A. & Dura, J. M. Nuclear receptors and *Drosophila* neuronal remodeling.  
469 *Biochim Biophys Acta* **1849**, 187-195, doi:10.1016/j.bbagr.2014.05.024 (2015).
- 470 8 Yaniv, S. P. & Schuldiner, O. A fly's view of neuronal remodeling. *Wiley Interdiscip Rev*  
471 *Dev Biol* **5**, 618-635, doi:10.1002/wdev.241 (2016).
- 472 9 Awasaki, T. & Ito, K. Engulfing action of glial cells is required for programmed axon  
473 pruning during *Drosophila* metamorphosis. *Curr Biol* **14**, 668-677,  
474 doi:10.1016/j.cub.2004.04.001  
475 S0960982204002544 [pii] (2004).
- 476 10 Watts, R. J., Schuldiner, O., Perrino, J., Larsen, C. & Luo, L. Glia engulf degenerating  
477 axons during developmental axon pruning. *Curr Biol* **14**, 678-684 (2004).
- 478 11 Tasdemir-Yilmaz, O. E. & Freeman, M. R. Astrocytes engage unique molecular  
479 programs to engulf pruned neuronal debris from distinct subsets of neurons. *Genes*  
480 *Dev* **28**, 20-33, doi:10.1101/gad.229518.113 (2014).
- 481 12 Hakim, Y., Yaniv, S. P. & Schuldiner, O. Astrocytes play a key role in *Drosophila*  
482 mushroom body axon pruning. *PLoS One* **9**, e86178,  
483 doi:10.1371/journal.pone.0086178 (2014).
- 484 13 Awasaki, T. *et al.* Essential role of the apoptotic cell engulfment genes *draper* and *ced-*  
485 *6* in programmed axon pruning during *Drosophila* metamorphosis. *Neuron* **50**, 855-867  
486 (2006).
- 487 14 Lee, T., Marticke, S., Sung, C., Robinow, S. & Luo, L. Cell-autonomous requirement of  
488 the USP/EcR-B ecdysone receptor for mushroom body neuronal remodeling in  
489 *Drosophila*. *Neuron* **28**, 807-818 (2000).
- 490 15 Zheng, X. *et al.* TGF-beta signaling activates steroid hormone receptor expression  
491 during neuronal remodeling in the *Drosophila* brain. *Cell* **112**, 303-315 (2003).
- 492 16 Paolicelli, R. C., Bisht, K. & Tremblay, M. E. Fractalkine regulation of microglial  
493 physiology and consequences on the brain and behavior. *Front Cell Neurosci* **8**, 129,  
494 doi:10.3389/fncel.2014.00129 (2014).
- 495 17 Arnoux, I. & Audinat, E. Fractalkine Signaling and Microglia Functions in the Developing  
496 Brain. *Neural Plast* **2015**, 689404, doi:10.1155/2015/689404 (2015).
- 497 18 Werneburg, S., Feinberg, P. A., Johnson, K. M. & Schafer, D. P. A microglia-cytokine axis  
498 to modulate synaptic connectivity and function. *Curr Opin Neurobiol* **47**, 138-145,  
499 doi:10.1016/j.conb.2017.10.002 (2017).
- 500 19 Luo, P., Chu, S. F., Zhang, Z., Xia, C. Y. & Chen, N. H. Fractalkine/CX3CR1 is involved in  
501 the cross-talk between neuron and glia in neurological diseases. *Brain Res Bull* **146**, 12-  
502 21, doi:10.1016/j.brainresbull.2018.11.017 (2019).
- 503 20 Wilton, D. K., Dissing-Olesen, L. & Stevens, B. Neuron-Glia Signaling in Synapse  
504 Elimination. *Annu Rev Neurosci* **42**, 107-127, doi:10.1146/annurev-neuro-070918-  
505 050306 (2019).
- 506 21 Gunner, G. *et al.* Sensory lesioning induces microglial synapse elimination via ADAM10  
507 and fractalkine signaling. *Nat Neurosci* **22**, 1075-1088, doi:10.1038/s41593-019-0419-  
508 y (2019).
- 509 22 Brand, A. H. & Perrimon, N. Targeted gene expression as a means of altering cell fates  
510 and generating dominant phenotypes. *Development* **118**, 401-415 (1993).
- 511 23 Lee, T. & Luo, L. Mosaic analysis with a repressible cell marker for studies of gene  
512 function in neuronal morphogenesis. *Neuron* **22**, 451-461 (1999).

- 513 24 Alyagor, I. *et al.* Combining Developmental and Perturbation-Seq Uncovers  
514 Transcriptional Modules Orchestrating Neuronal Remodeling. *Dev Cell* **47**, 38-52 e36,  
515 doi:10.1016/j.devcel.2018.09.013 (2018).
- 516 25 Hoopfer, E. D., Penton, A., Watts, R. J. & Luo, L. Genomic analysis of Drosophila  
517 neuronal remodeling: a role for the RNA-binding protein Boule as a negative regulator  
518 of axon pruning. *J Neurosci* **28**, 6092-6103 (2008).
- 519 26 Reynaud, E. *et al.* Guidance of Drosophila Mushroom Body Axons Depends upon DRL-  
520 Wnt Receptor Cleavage in the Brain Dorsomedial Lineage Precursors. *Cell Rep* **11**,  
521 1293-1304, doi:10.1016/j.celrep.2015.04.035 (2015).
- 522 27 Monneau, Y., Arenzana-Seisdedos, F. & Lortat-Jacob, H. The sweet spot: how GAGs  
523 help chemokines guide migrating cells. *J Leukoc Biol* **99**, 935-953,  
524 doi:10.1189/jlb.3MR0915-440R (2016).
- 525 28 Freeman, M. R., Delrow, J., Kim, J., Johnson, E. & Doe, C. Q. Unwrapping glial biology:  
526 Gcm target genes regulating glial development, diversification, and function. *Neuron*  
527 **38**, 567-580, doi:10.1016/s0896-6273(03)00289-7 (2003).
- 528 29 MacDonald, J. M. *et al.* The Drosophila cell corpse engulfment receptor Draper  
529 mediates glial clearance of severed axons. *Neuron* **50**, 869-881,  
530 doi:10.1016/j.neuron.2006.04.028 (2006).
- 531 30 Musashe, D. T., Purice, M. D., Speese, S. D., Doherty, J. & Logan, M. A. Insulin-like  
532 Signaling Promotes Glial Phagocytic Clearance of Degenerating Axons through  
533 Regulation of Draper. *Cell Rep* **16**, 1838-1850, doi:10.1016/j.celrep.2016.07.022  
534 (2016).
- 535 31 Kuraishi, T. *et al.* Pretaporter, a Drosophila protein serving as a ligand for Draper in the  
536 phagocytosis of apoptotic cells. *EMBO J* **28**, 3868-3878, doi:10.1038/emboj.2009.343  
537 (2009).
- 538 32 Lin, L. *et al.* Complement-Related Regulates Autophagy in Neighboring Cells. *Cell* **170**,  
539 158-171 e158, doi:10.1016/j.cell.2017.06.018 (2017).
- 540 33 Bach, E. A. *et al.* GFP reporters detect the activation of the Drosophila JAK/STAT  
541 pathway in vivo. *Gene Expr Patterns* **7**, 323-331, doi:10.1016/j.modgep.2006.08.003  
542 (2007).
- 543 34 Doherty, J., Logan, M. A., Tasdemir, O. E. & Freeman, M. R. Ensheathing glia function  
544 as phagocytes in the adult Drosophila brain. *J Neurosci* **29**, 4768-4781, doi:29/15/4768  
545 [pii]  
546 10.1523/JNEUROSCI.5951-08.2009 (2009).
- 547 35 Sepp, K. J., Schulte, J. & Auld, V. J. Developmental dynamics of peripheral glia in  
548 Drosophila melanogaster. *Glia* **30**, 122-133 (2000).
- 549 36 Lewis, E. B. & Bacher, F. Method of feeding ethyl methane sulfonate (EMS) to  
550 Drosophila males. *Dros. Inf. Serv.*, 193 (1968).
- 551 37 Hiller, K., Grote, A., Scheer, M., Munch, R. & Jahn, D. PrediSi: prediction of signal  
552 peptides and their cleavage positions. *Nucleic Acids Res* **32**, W375-379,  
553 doi:10.1093/nar/gkh378 (2004).
- 554 38 Krogh, A., Larsson, B., von Heijne, G. & Sonnhammer, E. L. Predicting transmembrane  
555 protein topology with a hidden Markov model: application to complete genomes. *J*  
556 *Mol Biol* **305**, 567-580, doi:10.1006/jmbi.2000.4315 (2001).
- 557 39 Vives, R. R. *et al.* A novel strategy for defining critical amino acid residues involved in  
558 protein/glycosaminoglycan interactions. *J Biol Chem* **279**, 54327-54333,  
559 doi:10.1074/jbc.M409760200 (2004).

- 560 40 Port, F., Chen, H. M., Lee, T. & Bullock, S. L. Optimized CRISPR/Cas tools for efficient  
561 germline and somatic genome engineering in *Drosophila*. *Proc Natl Acad Sci U S A* **111**,  
562 E2967-2976, doi:10.1073/pnas.1405500111 (2014).
- 563 41 Boulanger, A. *et al.* ftz-f1 and Hr39 opposing roles on EcR expression during *Drosophila*  
564 mushroom body neuron remodeling. *Nat Neurosci* **14**, 37-44, doi:nn.2700 [pii]  
565 10.1038/nn.2700 (2011).
- 566 42 Talbot, W. S., Swyryd, E. A. & Hogness, D. S. *Drosophila* tissues with different  
567 metamorphic responses to ecdysone express different ecdysone receptor isoforms.  
568 *Cell* **73**, 1323-1337 (1993).
- 569 43 Pfeiffer, B. D., Truman, J. W. & Rubin, G. M. Using translational enhancers to increase  
570 transgene expression in *Drosophila*. *Proc Natl Acad Sci U S A* **109**, 6626-6631,  
571 doi:10.1073/pnas.1204520109 (2012).
- 572 44 Hoover, D. M., Mizoue, L. S., Handel, T. M. & Lubkowski, J. The crystal structure of the  
573 chemokine domain of fractalkine shows a novel quaternary arrangement. *J Biol Chem*  
574 **275**, 23187-23193, doi:10.1074/jbc.M002584200 (2000).
- 575 45 McLaughlin, C. N., Perry-Richardson, J. J., Coutinho-Budd, J. C. & Broihier, H. T. Dying  
576 Neurons Utilize Innate Immune Signaling to Prime Glia for Phagocytosis during  
577 Development. *Dev Cell* **48**, 506-522 e506, doi:10.1016/j.devcel.2018.12.019 (2019).
- 578 46 Doherty, J. *et al.* PI3K signaling and Stat92E converge to modulate glial responsiveness  
579 to axonal injury. *PLoS Biol* **12**, e1001985, doi:10.1371/journal.pbio.1001985 (2014).

580  
581

## 582 **Acknowledgements**

583 We thank Amélie Babled, Pascal Carne and Dana Bis-Brewer for help in the EMS  
584 mutagenesis, MB developmental studies and WGS analysis respectively, Oren Schuldiner for  
585 discussions about the Orion expression and function. We thank Marc Freeman for *alrm-GAL4*  
586 stock, Baeg Gyeong Hun for *10X-STAT92E-GFP* stock, the Bloomington *Drosophila* Stock  
587 Center and VDRC for fly stocks, the *Drosophila* facility, BioCampus Montpellier, CNRS,  
588 INSERM, Université de Montpellier, the imaging facility MRI, which is part of the UMS  
589 BioCampus Montpellier and a member of the national infrastructure France-BioImaging,  
590 supported by the French National Research Agency (ANR-10-INBS-04) for help in confocal  
591 and image analysis and processing. We acknowledge BDGP, BestGene, GenScript and  
592 Genewiz for cDNA clone, transgene service, gene synthesis and DNA sequencing, respectively.  
593 The 1D4 anti-Fasciclin II hybridoma and the 8D12 anti-Repo monoclonal antibody developed  
594 by Corey Goodman and the 8A1 anti-Draper monoclonal antibody developed by Mary Logan  
595 were obtained from the Developmental Studies Hybridoma Bank, created by the NICHD of the  
596 NIH and maintained at The University of Iowa, Department of Biology, Iowa City, IA 52242.

597 **Funding:** C.T. was supported by grants from the INSB at the CNRS and from the Fondation  
598 pour la Recherche Médicale. Work in the laboratory of J.-M.D. was supported by the Centre

599 National de la Recherche Scientifique, the Association pour la Recherche sur le Cancer (grants  
600 SFI20121205950 and PJA 20151203422) and the Fondation pour la Recherche Médicale  
601 (Programme "EQUIPES FRM2016" project DEQ20160334870).

602

### 603 **Author contributions**

604 A.B. and J.-M.D. designed the project; A.B., C.T. and J.-M.D. performed the experiments;  
605 A.B., S.Z., L.G.F., H.L.-J. and J.-M.D. analyzed the data; A.B. and J.-M.D. wrote the original  
606 draft of the manuscript; A.B., L.G.F., H.L.-J. and J.-M.D. reviewed and edited the manuscript.

607

### 608 **Competing interests**

609 The authors declare no competing interests.

610

### 611 **Additional information**

612 **Supplementary information:** Supplementary Fig. 1 to 10 and Supplementary list of fly strains

613

614

615

Fig. 1

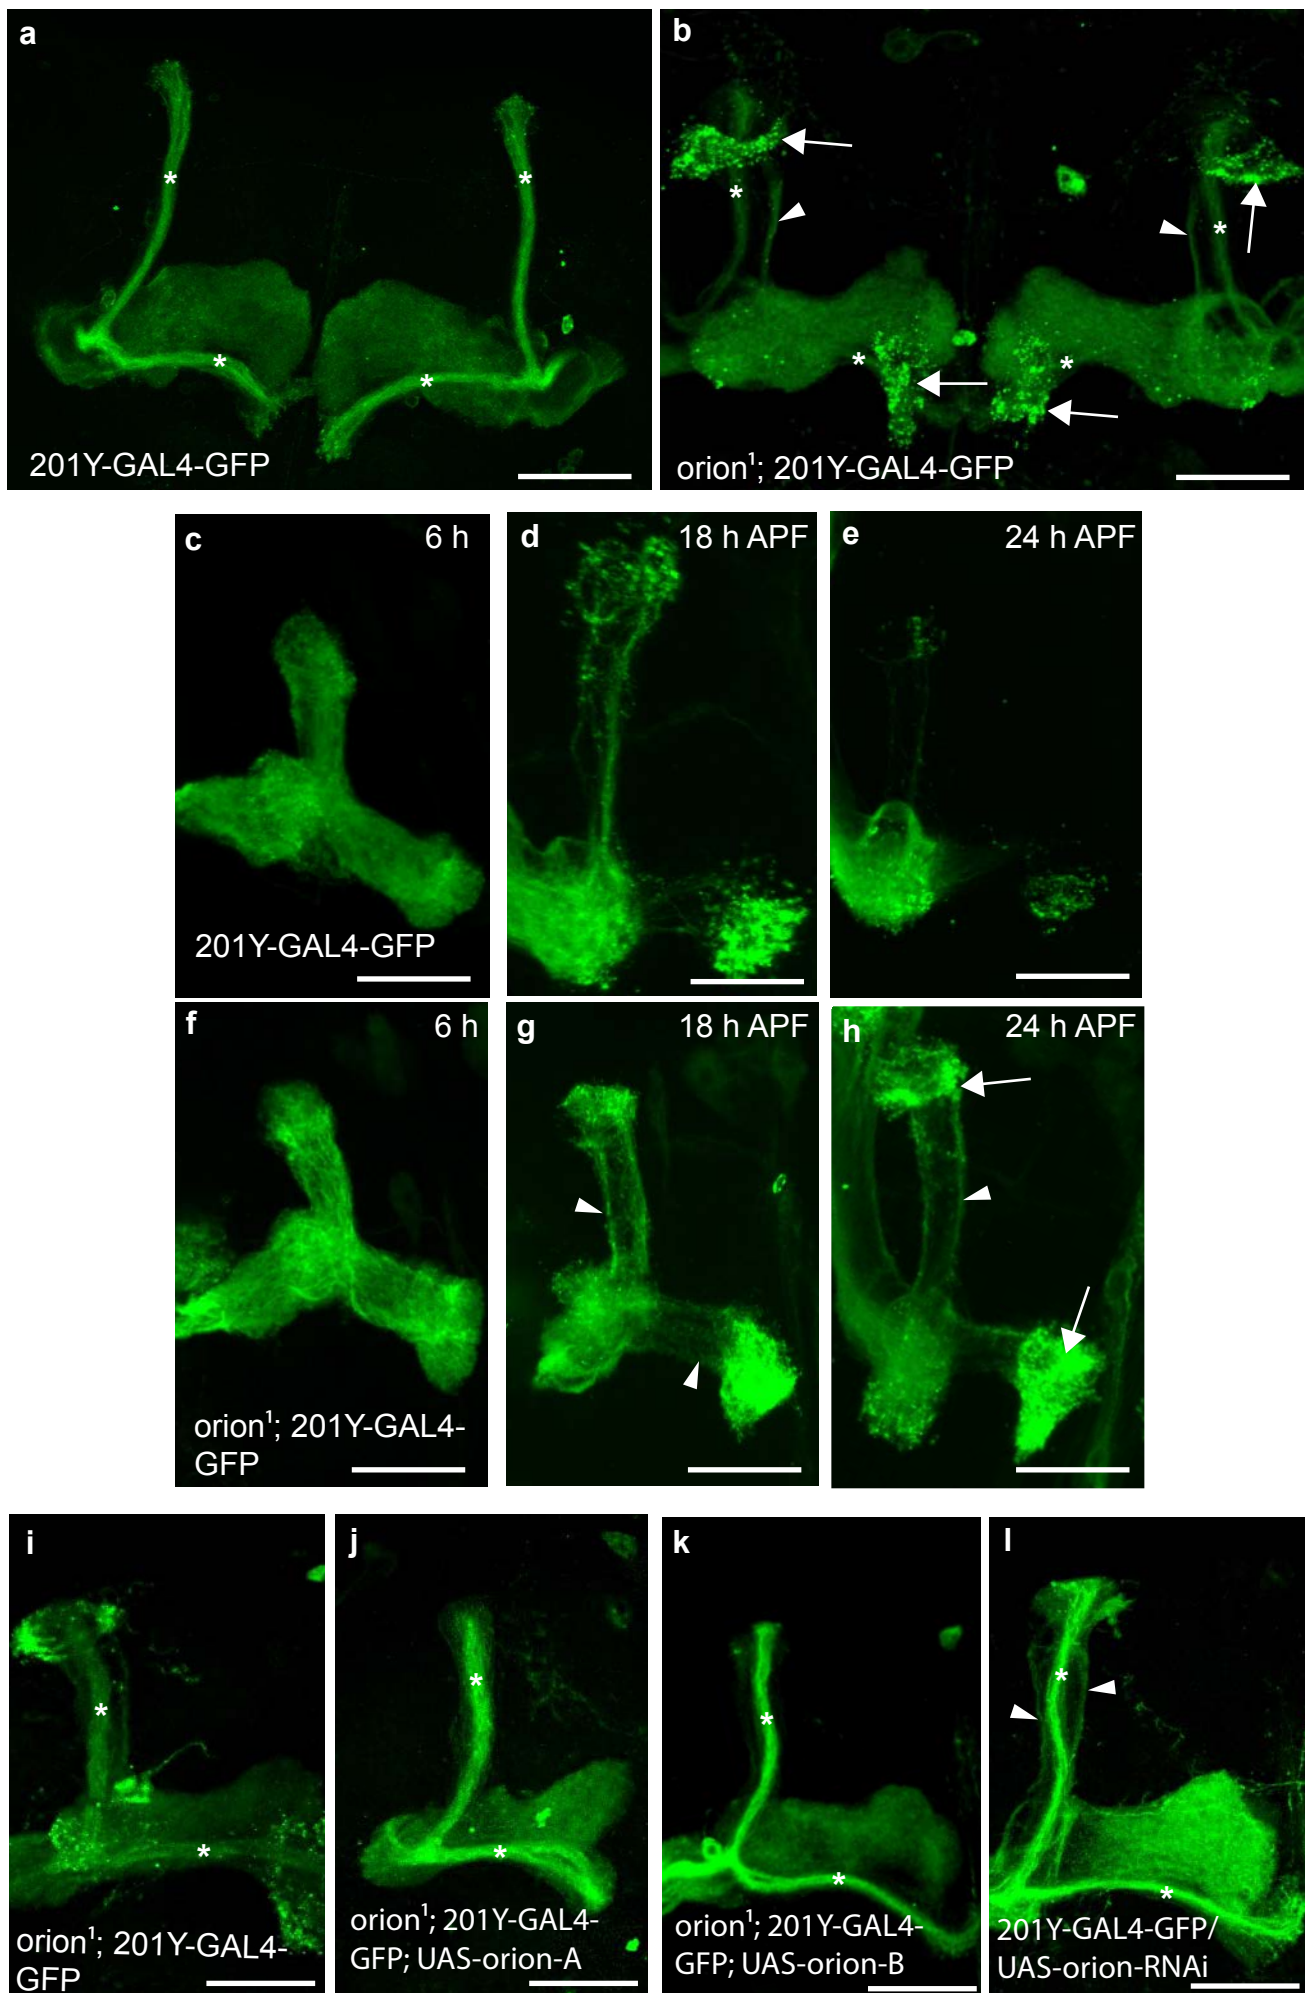



616 **Fig. 1. The *orion* gene is necessary for MB remodeling.** **a-l**,  $\gamma$  neurons are visualized by the  
617 expression of *201Y-GAL4* driven *UAS-mCD8-GFP* (green). In adults, this GAL4 line also  
618 labels the  $\alpha\beta$ -core axons shown here by asterisks. **a, b**, Adult  $\gamma$  axons in control (**a**) and *orion*<sup>1</sup>  
619 (**b**). Note the presence of unpruned  $\gamma$  axon bundles (arrowhead) and the high amount of  
620 uncleared axonal debris (arrows) in *orion*<sup>1</sup> compared to wild-type ( $n \geq 100$  MBs for control and  
621 *orion*<sup>1</sup>. See quantitation in Table I and Supplementary Fig. 2). **c-h**,  $\gamma$  axon development in wild-  
622 type (**c-e**) and *orion*<sup>1</sup> (**f-h**) at 6 h, 18 h and 24 h APF as indicated. Unpruned axons (arrowhead)  
623 in *orion*<sup>1</sup> are already apparent at 18 h APF (compare **g** with **d**) although no differences are  
624 detected at 6 h APF (**c** and **f**). Note the presence of unpruned  $\gamma$  axons (arrowhead) and debris  
625 (arrow) in *orion*<sup>1</sup> at 24 h APF ( $n \geq 40$  MBs for each developmental stage). **i-k**, The adult *orion*<sup>1</sup>  
626 phenotype (**i**) is completely rescued by expression in MBs of *UAS-orion-A* ( $n = 89$  MBs) (**j**) or  
627 *UAS-orion-B* ( $n = 387$  MBs) (**k**). **l**, *UAS-orion-RNAi* expression in MBs results in unpruned  $\gamma$   
628 axon phenotypes (arrowheads) ( $n = 20$  MBs). Scale bars represent 40  $\mu\text{m}$ . All the images are  
629 composite confocal images. Genotypes are listed in Supplementary list of fly strains.  
630



Table I

### Presence of unpruned axons in $\geq$ one-week-old adults

**a**

|                  | MB | None | Weak | Strong |
|------------------|----|------|------|--------|
| WT               | 25 | 25   | 0    | 0      |
| Hr39             | 22 | 0    | 0    | 22     |
| orion $\Delta$ C | 22 | 0    | 22   | 0      |
| orion1           | 20 | 0    | 20   | 0      |
| orionRNAi        | 34 | 0    | 34   | 0      |
| drpr $\Delta$ 5  | 22 | 20   | 2    | 0      |

### Presence of axon debris in $\geq$ one-week-old adults

**b**

|                  | MB | None | Mild | Intermediary | Strong |
|------------------|----|------|------|--------------|--------|
| WT               | 25 | 25   | 0    | 0            | 0      |
| Hr39             | 22 | 22   | 0    | 0            | 0      |
| orion $\Delta$ C | 22 | 0    | 0    | 0            | 22     |
| orion1           | 20 | 0    | 0    | 0            | 20     |
| orionRNAi        | 34 | 34   | 0    | 0            | 0      |
| drpr $\Delta$ 5  | 22 | 16   | 2    | 2            | 2      |

### Presence of axon debris in $\leq$ 2 h-old adults

**c**

|                  | MB | Scattered dots | Mild | Intermediary | Strong |
|------------------|----|----------------|------|--------------|--------|
| WT               | 10 | 10             | 0    | 0            | 0      |
| orion $\Delta$ C | 12 | 0              | 0    | 0            | 12     |
| drpr $\Delta$ 5  | 73 | 40             | 11   | 4            | 18     |

631 **Table I. Unpruned axon and axon debris quantitation.** Genotypes are indicated on the left.  
632 “MB“ indicates the number of mushroom bodies observed for each genotype. Unpruned axons  
633 were ranked in three categories: “None” indicates the absence of unpruned  $\gamma$  axons, “Weak”  
634 and “Strong” refer to different levels of the mutant pruning phenotype. Axon debris were ranked  
635 in five categories: “None” indicates the absence of debris, “Scattered dots” means that some  
636 individual debris can be observed. “Mild”, “Intermediate” and “Strong” refer to different levels  
637 of debris (see Supplementary Fig. 2 and Methods). Full genotypes are listed in Supplementary  
638 list of fly strains.  
639

Fig. 2

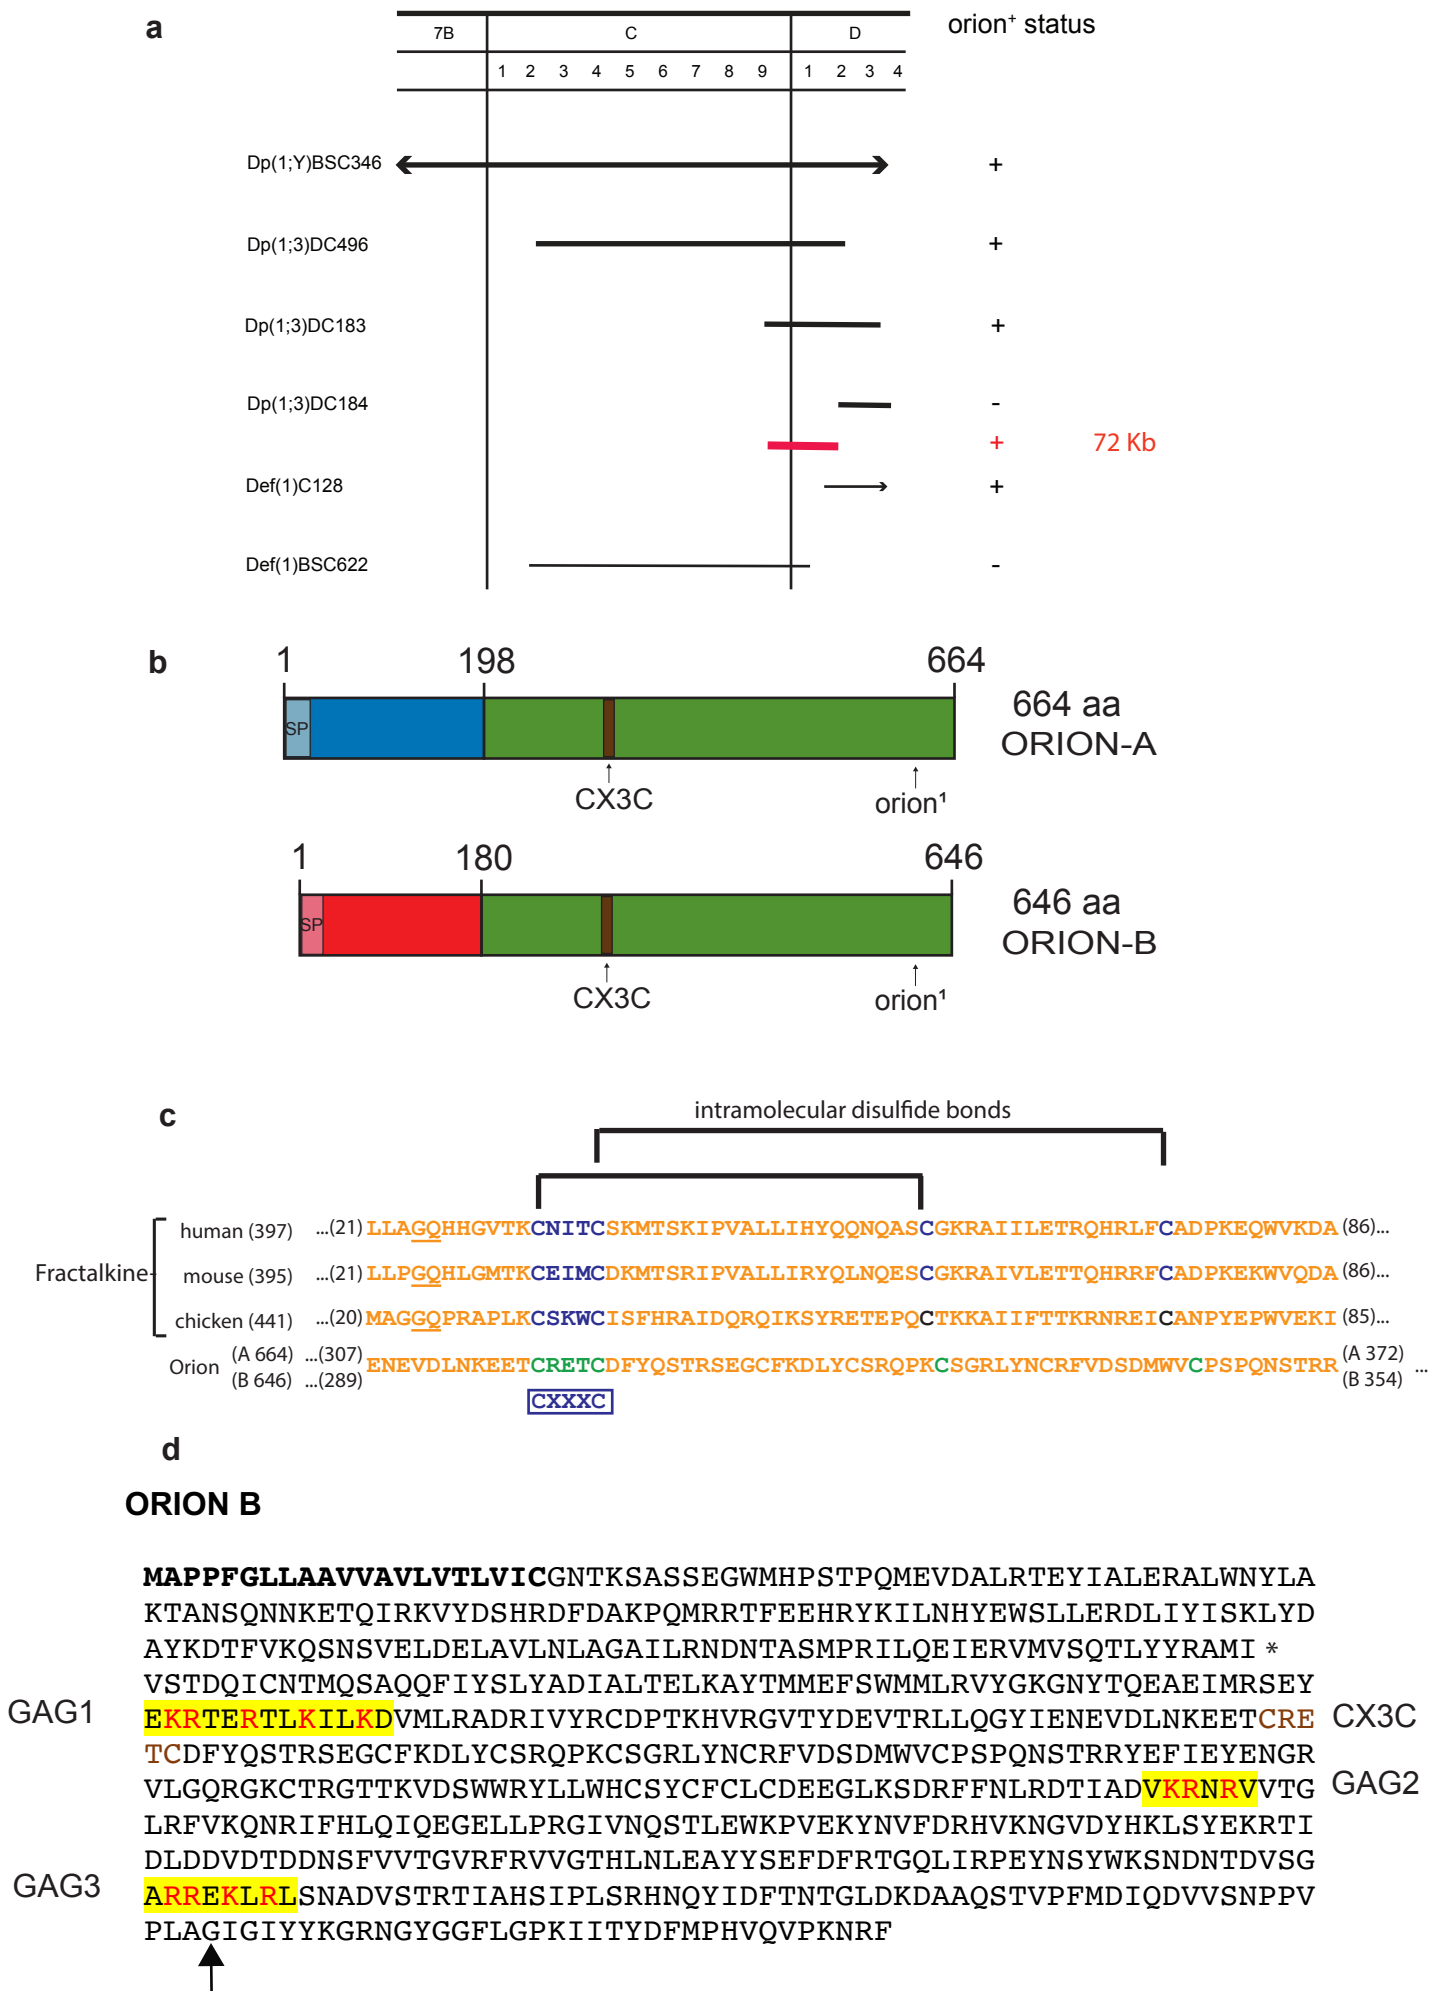

640 **Fig. 2. The *orion* gene encodes for a CX<sub>3</sub>C motif-containing protein.** **a**, Complementation  
641 map of *orion* with the tested duplications and deficiencies in the 7B-7D region. Duplications  
642 are drawn with a heavy line and deficiencies with a light line. If *orion*<sup>+</sup> is present on the  
643 chromosome carrying a duplication or deficiency it is indicated in the status column with a “+”;  
644 and if it is not present it is marked “-“. The red line indicates the location of the 72 kb to which  
645 *orion* is mapped based on the complementation results. **b**, Linear representation of the  
646 polypeptide chain of the two Orion isoforms. Green represents the common region of the two  
647 Orion proteins, blue is the specific N-terminal region of Orion-A and red the specific N-terminal  
648 region of Orion-B. The signal peptide of Orion-A and Orion-B (SP) are colored in light blue or  
649 light red, respectively. The CX<sub>3</sub>C chemokine-motif as well as the location of the *orion*<sup>l</sup>  
650 mutation present in the common region of Orion-A and Orion-B are indicated. **c**, Amino acid  
651 sequence lineups of human, mouse and chicken fractalkines with the common CX<sub>3</sub>C-bearing  
652 motif of the *Drosophila* Orion proteins is shown. The number in parenthesis after the species’  
653 names indicate the total length of the protein. The underlined sequences in the fractalkine  
654 sequences indicate the junctions at which their signal peptides are cleaved. The numbers at the  
655 beginning and end of the sequence indicate the protein regions in the lineup. The CX<sub>3</sub>C  
656 (CXXXC) and conserved downstream cysteines in the fractalkine species are indicated in blue.  
657 Fractalkine intramolecular disulfide bonds between conserved cysteines<sup>44</sup> are specified with  
658 brackets. The CX<sub>3</sub>C motif in the Orions and the downstream cysteines are indicated in green.  
659 The Orion downstream cysteines are offset by one and two amino acids, respectively, from  
660 those in fractalkine relative to the CX<sub>3</sub>C motif cysteines. The Orions differ from fractalkine  
661 by the inclusion of considerable extensions upstream to the CX<sub>3</sub>C motif while the fractalkine  
662 CX<sub>3</sub>C motifs lie within 10 amino acids of the mature signal peptide-cleaved proteins. **d**, Orion-  
663 B amino-acid sequence where the signal peptide is in bold, the three putative GAG binding  
664 sites (GAG1, GAG2, GAG3) are highlighted in yellow, the basic residues involved in GAG  
665 binding (R = Arg and K = Lys) are in red and the CX<sub>3</sub>C site is in brown. An asterisk is located  
666 at the end of the Orion-B specific amino-acid sequence/beginning of the common region. The  
667 glycine (GGC) which is mutated to an aspartic acid (GAC) in *orion*<sup>l</sup> is indicated by an arrow.  
668

Fig. 3

GFP / anti-Myc

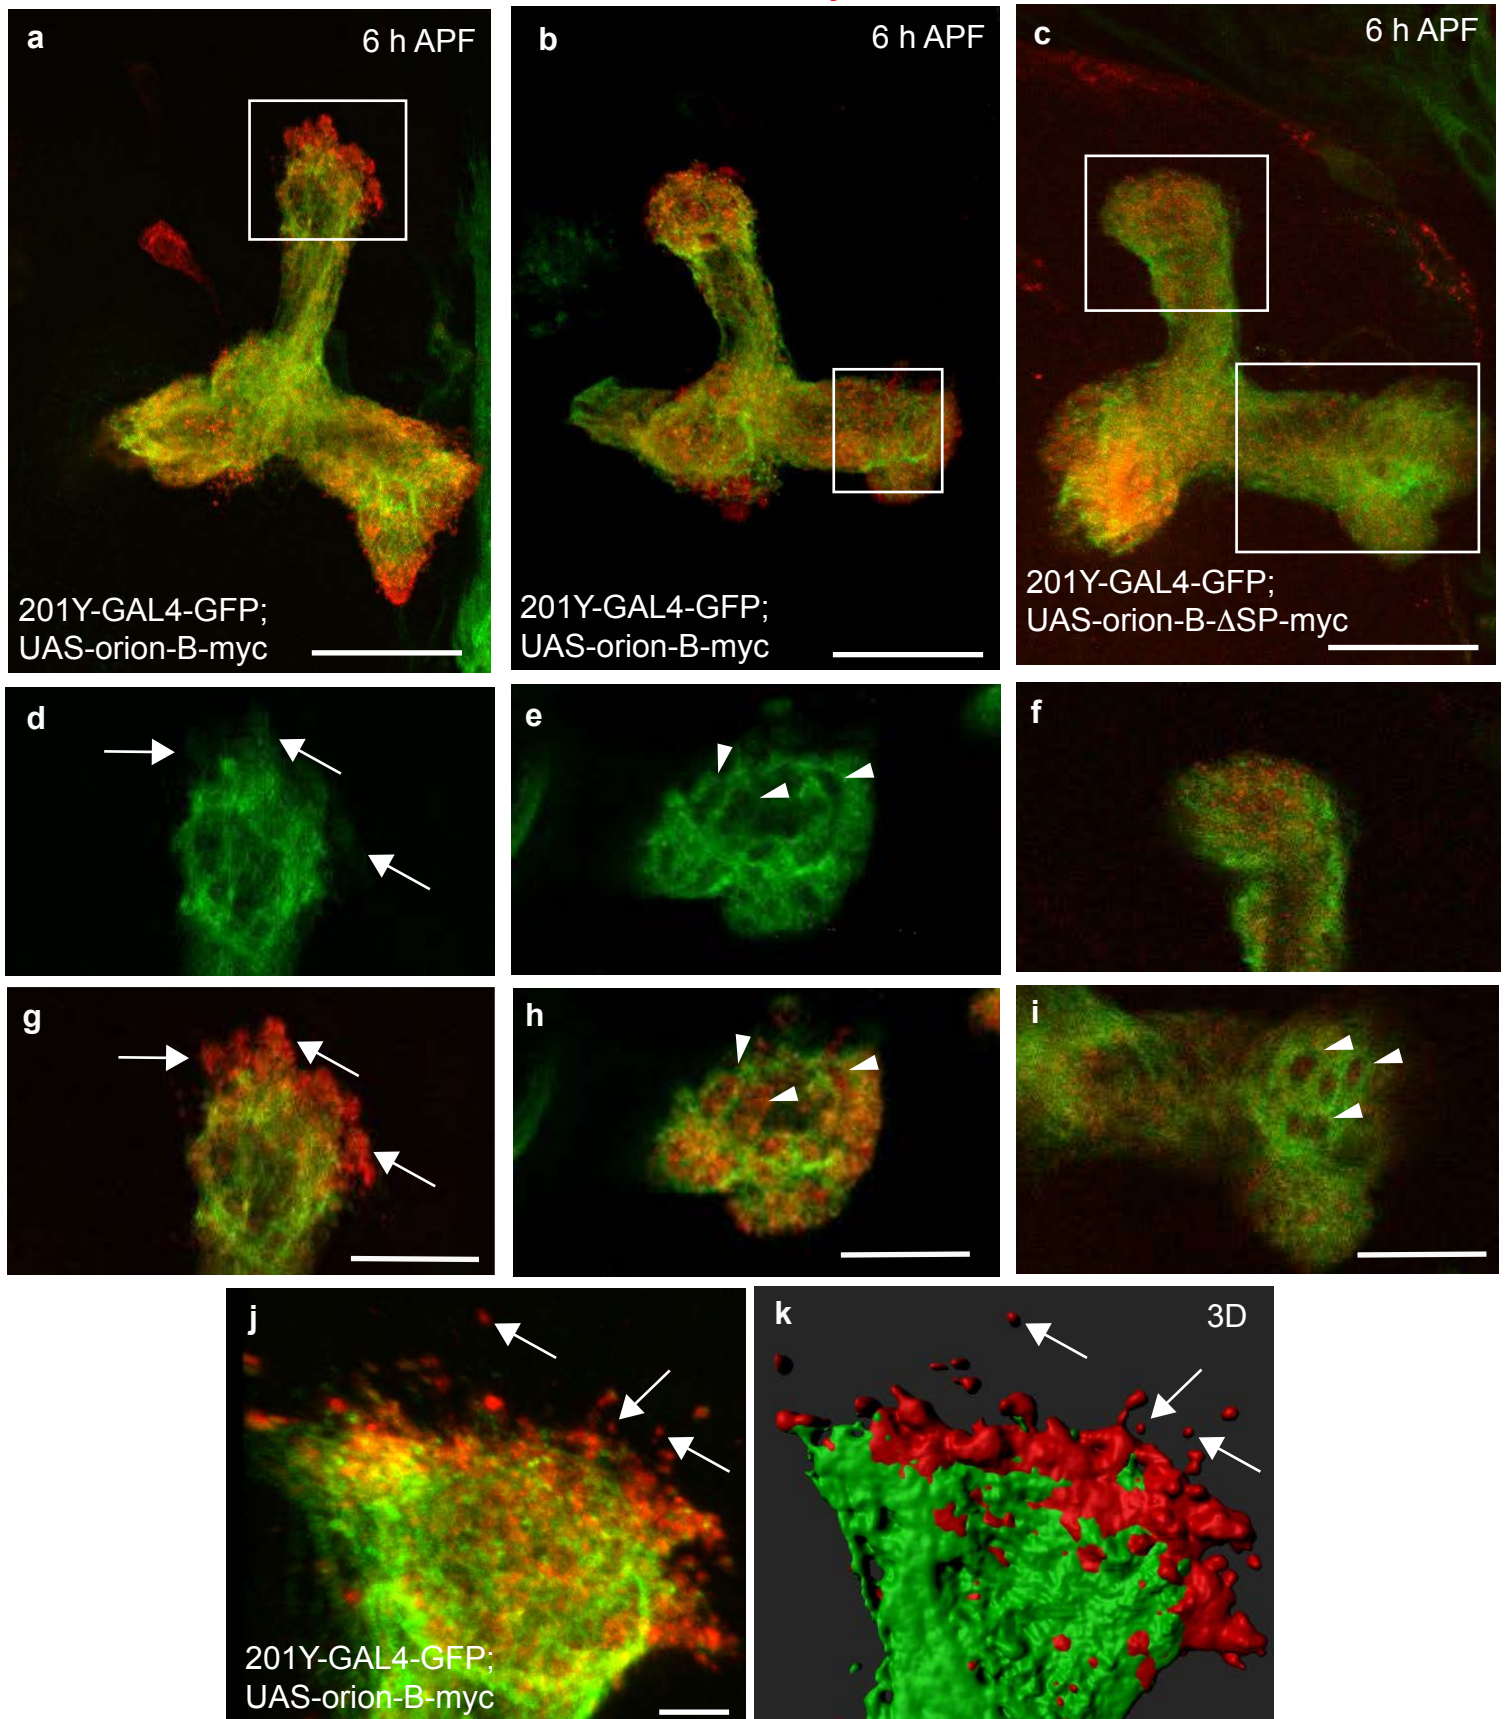

669 **Fig. 3. Orion is secreted by MB  $\gamma$  axons. a-k** 6 h APF  $\gamma$  axons are visualized by the expression  
670 of *201Y-GAL4*-driven *UAS-mCD8-GFP* (green). **a, b, j, k**,  $\gamma$  axons expressing the wild-type  
671 Orion-B-Myc protein (red) ( $n \geq 10$  MBs). **c**,  $\gamma$  axons expressing the Orion-B-Myc protein  
672 lacking the signal peptide ( $\Delta$ SP) ( $n = 9$  MBs). **a-c** are confocal Z-projections and **j** is a unique  
673 confocal plane. **d, g**, higher magnification images of the region indicated by rectangle in **a**  
674 showing a representative unique confocal plane. Note the presence of Myc-labelled Orion-B  
675 outside of the  $\gamma$  axon bundle (arrows). **e, h**, higher magnification images of the region indicated  
676 by rectangle in **b** showing a representative unique confocal plane. Note the presence of Myc-  
677 labelled Orion-B inside of the hole-like structures present in the  $\gamma$  axon bundle (arrowheads). **f,**  
678 **i**, higher magnification images of the vertical and medial  $\gamma$  lobes, respectively (rectangles in **c**).  
679 Orion-B- $\Delta$ SP-Myc is not observed neither outside of the  $\gamma$  axons (**f**) nor in the hole-like  
680 structures (arrowheads in **i**). **j, k** Presence of Myc-labelled Orion-B secreted proteins not  
681 associated with GFP-labelled axon membranes can be observed outside of the  $\gamma$  axon bundle  
682 (arrows). **k**, Three-dimensional surface-rendering (3D) of the confocal image. **j**, reveals close  
683 apposition of GFP-labelled axons and Myc-labelled Orion and reveals Orion is present as small  
684 extracellular globules. Scale bars represent 40  $\mu\text{m}$  in **a-c**, 20  $\mu\text{m}$  in **d-i** and 5  $\mu\text{m}$  in **j, k**. Full  
685 genotypes are listed in Supplementary list of fly strains.  
686



Fig. 4

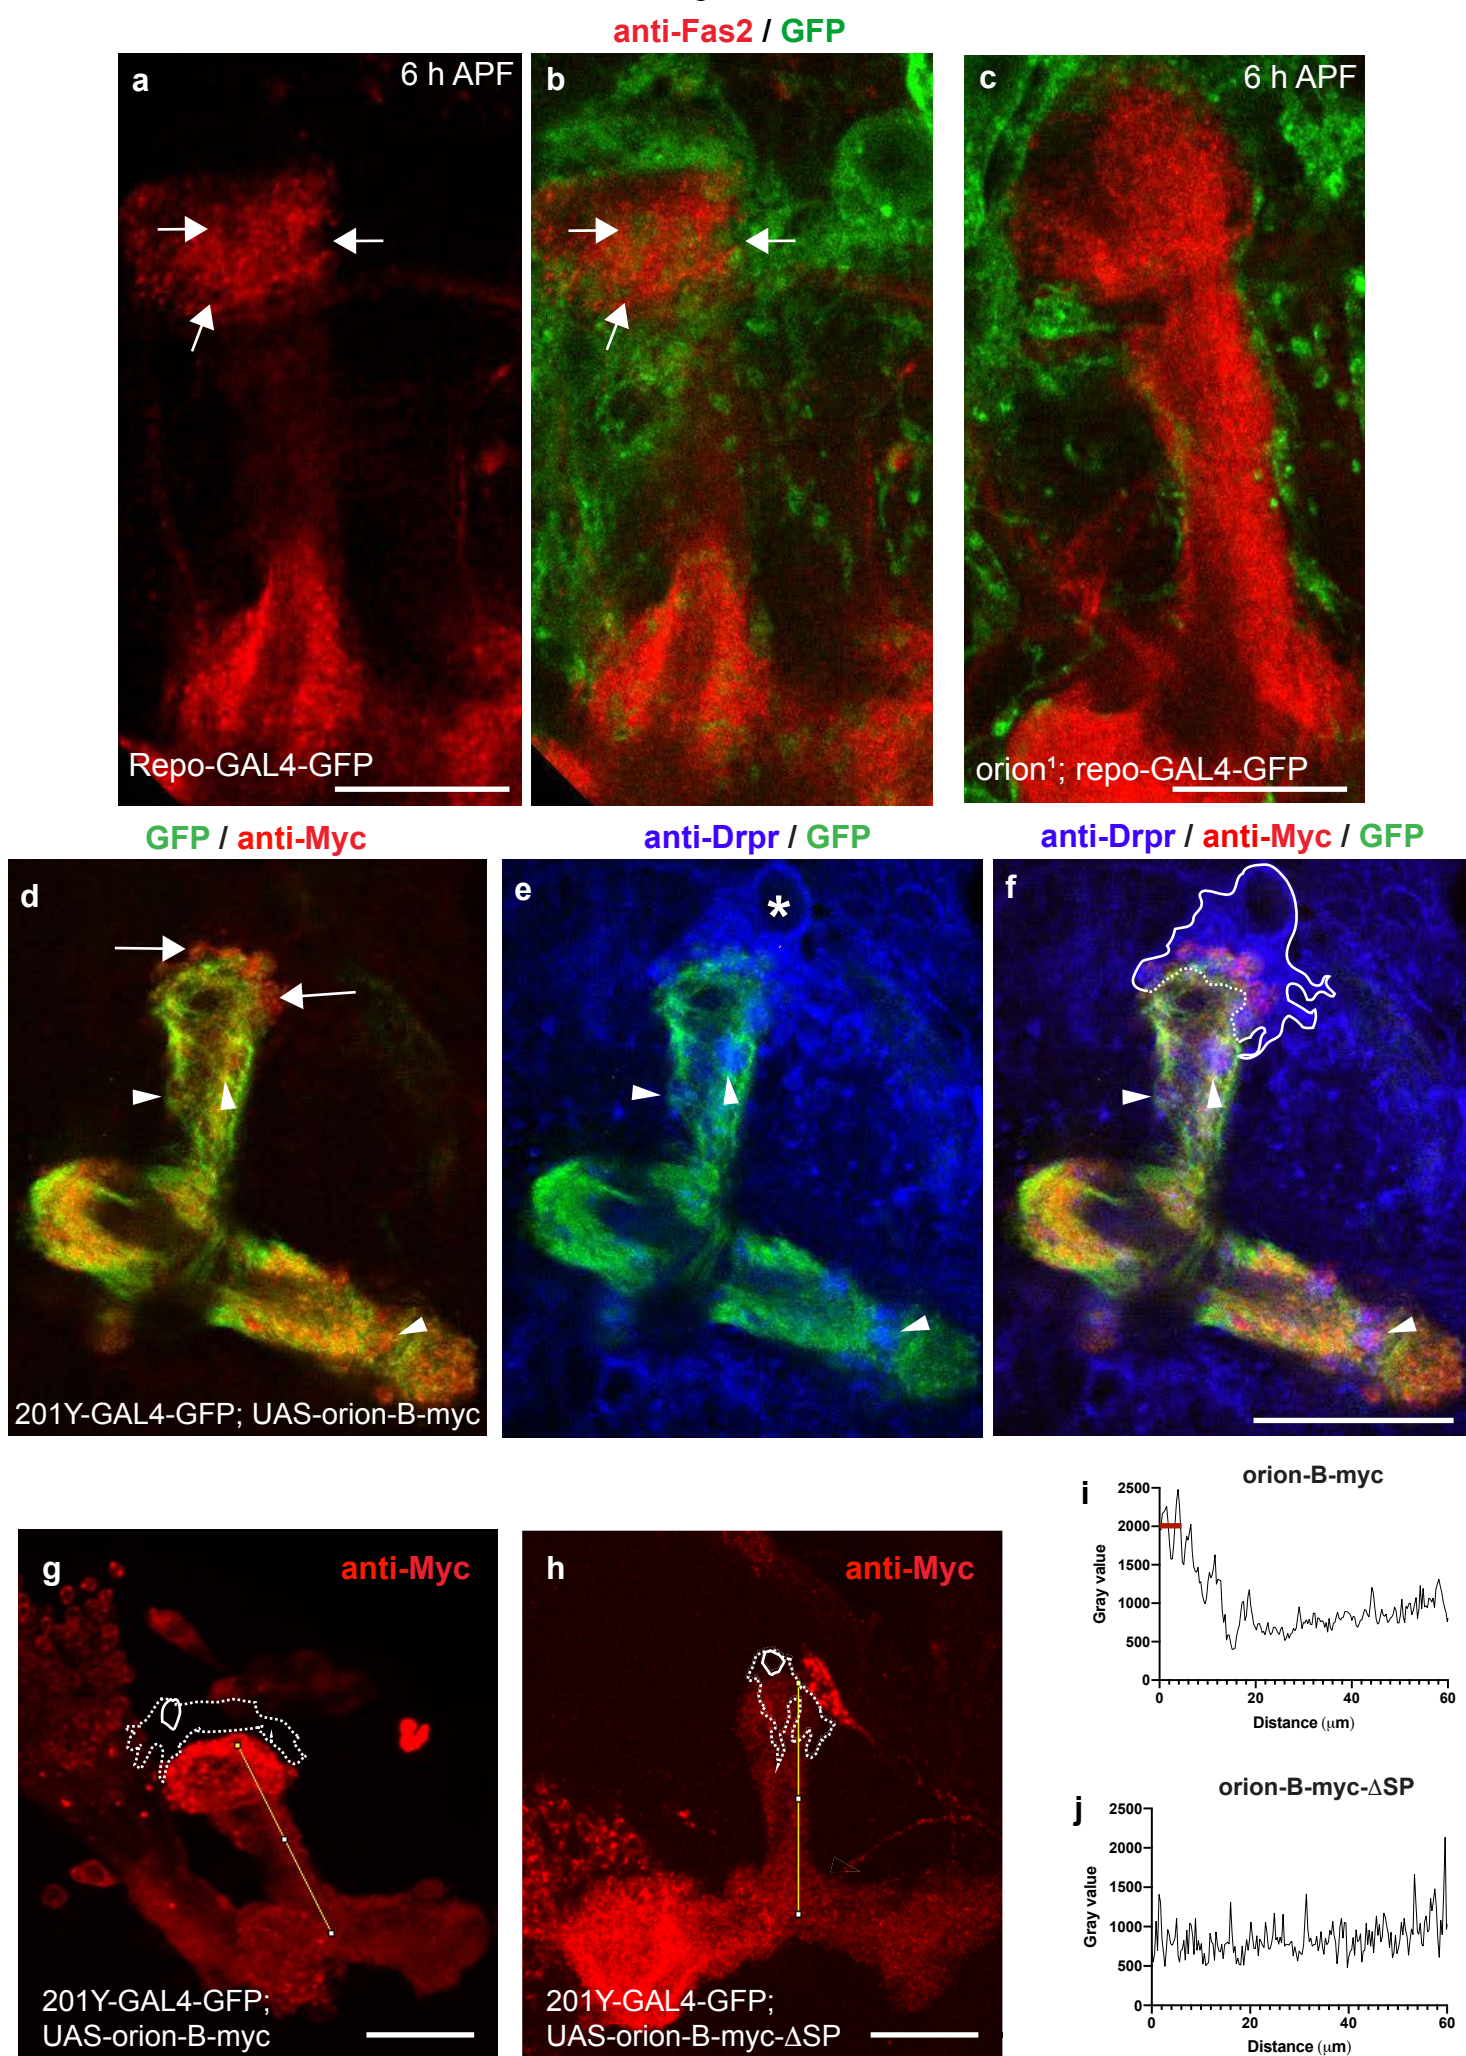

687 **Fig. 4. Orion is required for the infiltration of astrocytes into the MB  $\gamma$  bundle at 6 h APF.**

688 **a-c**, Single confocal planes of 6 h APF brains expressing *repo-GAL4*-driven *UAS-mCD8-GFP*  
689 (green) in controls (**a, b**) and *orion<sup>1</sup>* (**c**) focused on the MB dorsal lobe (n = 12 MBs controls  
690 and n = 20 MBs *orion<sup>1</sup>*). Anti-Fas2 staining (red) reveals spherical hole-like structures occupied  
691 by glial processes infiltrating into the  $\gamma$  bundle (green, arrows) in wild-type (**a, b**) but not in  
692 *orion<sup>1</sup>* individuals (**c**). Scale bars are 20  $\mu$ m. **d-f**, A single confocal plane showing the  
693 expression of *201Y-GAL4* driven *UAS-mCD8-GFP* (green, **d-f**) and Orion-B-Myc (red, **d, f**) in  
694 6 h APF MB. Anti-Drpr antibody (blue) was used to visualize the glial cells (blue, **e, f**). **d**,  
695 displays Orion-B-Myc expression outside of the axons at the top of the vertical  $\gamma$  bundle  
696 (arrows) as well as in hole-like structures (arrowheads). **e**, displays an astrocyte positioned at  
697 the top of the  $\gamma$  bundle (asterisk in its nuclei) as well as several astrocyte processes occupying  
698 hole-like structures (arrowheads). Note the co-localization of Orion-B-Myc and glia processes  
699 in the hole-like structures (arrowheads in **f**). The astrocyte cell membrane (continuous line) and  
700 the membrane contacting the tip of the  $\gamma$  bundle (dotted line), where phagocytosis is taking  
701 place, based on our interpretation of the astrocyte limits according to the green and the blue  
702 channels for GFP and Drpr, respectively, are indicated in **f**. Scale bar is 40  $\mu$ m. **g, h**,  
703 Representative images to illustrate how the quantitation of Orion-B-Myc expression (red), **g**,  
704 and Orion-B- $\Delta$ SP-Myc, **h**, driven by *201Y-GAL4* in a traced 60  $\mu$ m line contained in a  $\gamma$  axon  
705 vertical bundle was performed. The position of an astrocyte (dotted line), labeled by anti-Drpr  
706 staining (not shown), and its nucleus (solid circle) are indicated. **i, j** Representative plotted  
707 intensity profiles of Orion expression (gray value) in Orion-B-Myc- (**i**) or Orion-B- $\Delta$ SP-Myc-  
708 expressing MBs (**j**), according to the distance from the tips (0  $\mu$ m) to the bottoms (60  $\mu$ m) of  
709 vertical  $\gamma$  bundles. The highest peaks are always located at less than 7  $\mu$ m distance to the tip of  
710 the vertical bundle (red bar) when Orion-B-Myc is expressed (n = 10) although this was never  
711 the case (n = 9) when secretion-deficient Orion-B- $\Delta$ SP-Myc expression was quantified. Scale  
712 bar in **g** and **h** are 30  $\mu$ m. Full genotypes are listed in Supplementary list of fly strains.

713

714

715

716

717

718

719

720

721 **Supplementary Materials for**

722

723 **Axon-secreted chemokine-like Orion is a signal for astrocyte infiltration**  
724 **during neuronal remodeling**

725

726 Ana Boulanger<sup>1\*</sup>, Camille Thinat<sup>1</sup>, Stephan Züchner<sup>2</sup>, Lee G. Fradkin<sup>3</sup>, Hugues Lortat-Jacob<sup>4</sup>  
727 and Jean-Maurice Dura<sup>1\*</sup>

728

729

730 \*e-mail: [ana.boulanger@igh.cnrs.fr](mailto:ana.boulanger@igh.cnrs.fr); [jean-maurice.dura@igh.cnrs.fr](mailto:jean-maurice.dura@igh.cnrs.fr)

731

732

733

734 Supplementary Fig. 1 to 10

735

Supplementary list of fly strains

736



### Supplementary Fig. 1

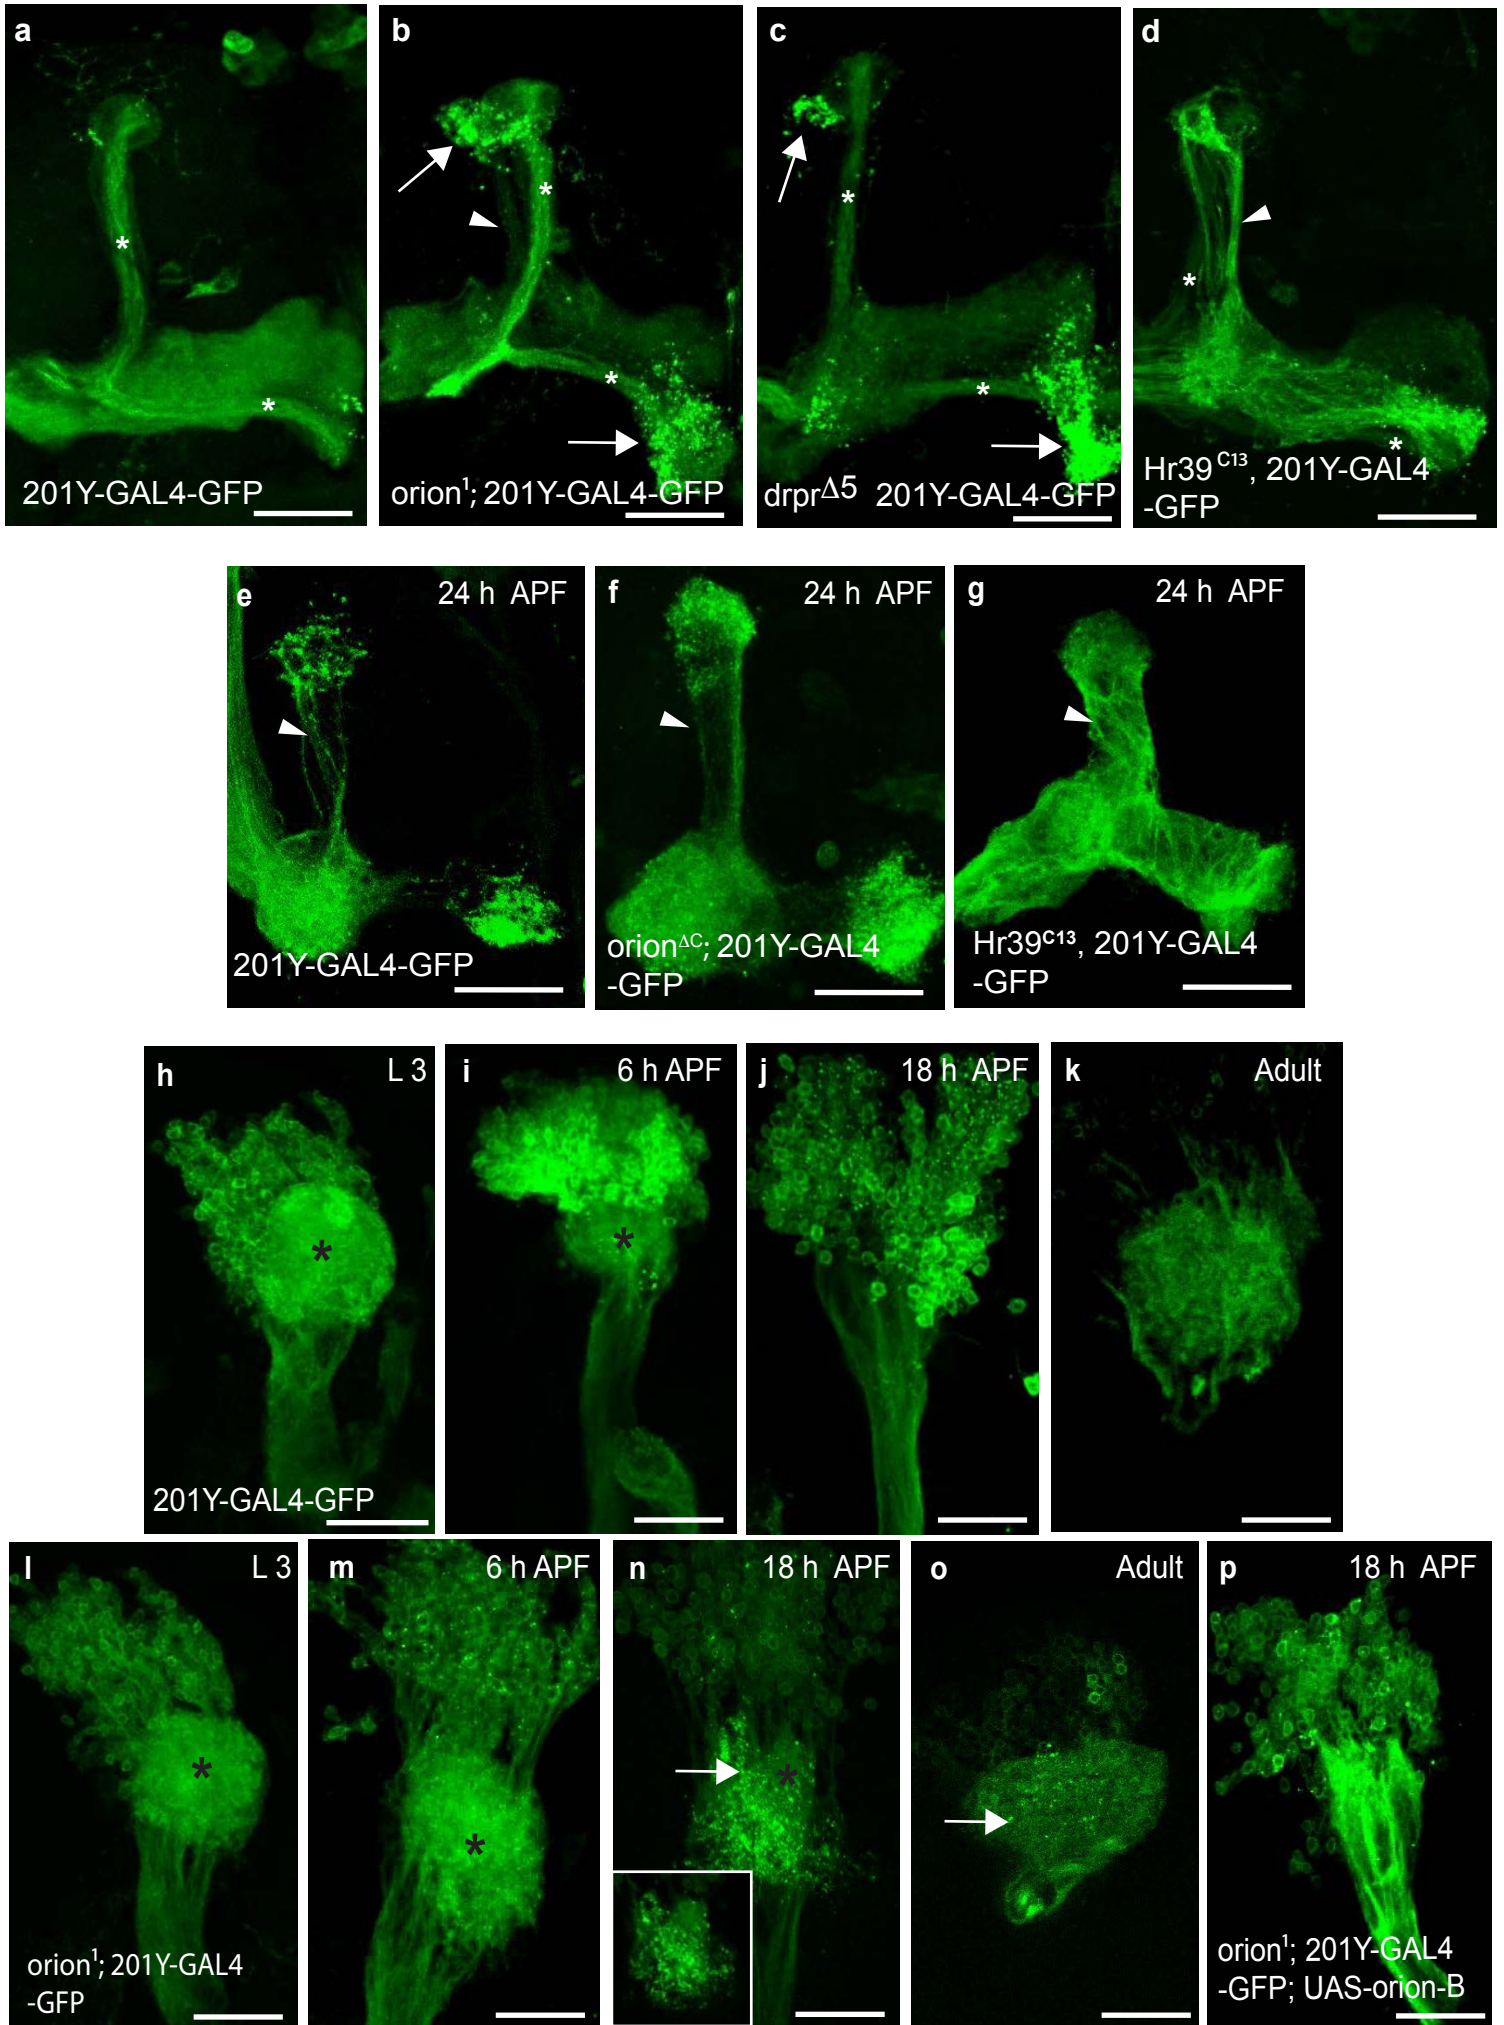

737 **Supplementary Fig. 1. The *orion* gene is necessary for  $\gamma$  axon and dendritic remodeling.**

738 **a-d**, Expression of *201Y-GAL4*-driven *UAS-mCD8-GFP* (green) in adult MB  $\gamma$  axons. In adults,  
739 this GAL4 line also labels the  $\alpha\beta$ -core axons indicated here by asterisks. Wild-type (**a**), *orion<sup>l</sup>*  
740 (**b**), *draper <sup>$\Delta$ 5</sup>* (**c**) and *Hr39<sup>C13</sup>* (**d**) (n = 22, 26, 30 and 4 MBs). The glial phagocytic receptor  
741 *Drpr* is required for MB remodeling<sup>13</sup>. Note the significant similarity between the *orion<sup>l</sup>* and  
742 *draper <sup>$\Delta$ 5</sup>* phenotypes with respect to the distribution and the amount of axonal debris remaining  
743 (arrows in **b** and **c**); they differ by the presence of unpruned  $\gamma$  axons only in *orion<sup>l</sup>* (arrowhead  
744 in **b**; see also Fig. 1b). In addition, the *draper <sup>$\Delta$ 5</sup>* phenotype is observed only in very young flies  
745<sup>13</sup>. In contrast, the *orion<sup>l</sup>* phenotype persists throughout adult life at least up to one month old  
746 in *orion<sup>l</sup>* males. Expression of *Hr39* in  $\gamma$  neurons results in only unpruned  $\gamma$  axons (arrowhead)  
747 without debris (**d**). In this case, the pruning process is completely blocked due to the *EcR-B1*  
748 down-regulation by *Hr39* thus precluding the generation of axon debris<sup>41</sup>. **e-g**, Expression of  
749 *201Y-GAL4*-driven *UAS-mCD8-GFP* (green) in  $\gamma$  neuron axons at 24 h APF.  $\gamma$  axon  
750 development was observed in wild-type (**e**), *orion<sup>AC</sup>* (**f**) and *Hr39<sup>C13</sup>* (**g**) as indicated. In wild-  
751 type (**e**), only some scattered  $\gamma$  axons are still unpruned (arrowhead). Additional unpruned  
752 fascicles of axons (arrowhead) are apparent in *orion<sup>AC</sup>* (compare **f** with **e**). Note the massive  
753 presence of unpruned  $\gamma$  axons (arrowhead) in *Hr39<sup>C13</sup>* (**g**), where the  $\gamma$  axon-intrinsic  
754 fragmentation process is blocked. However, since the axon-intrinsic fragmentation process is  
755 still functional in *orion<sup>AC</sup>*, the number of these unpruned axons is much lower than in *Hr39<sup>C13</sup>*  
756 (n  $\geq$  10 MBs for each developmental stage). **h-p**, Expression of *201Y-GAL4*-driven *UAS-*  
757 *mCD8-GFP* (green) in  $\gamma$  neuron dendrites (black asterisks) during development. Wild-type  
758 control (**h-k**) and *orion<sup>l</sup>* (**l-p**)  $\gamma$  dendrites are compared at L3, 6 h APF, 18 h APF and adult as  
759 indicated. Note the presence of intact larval  $\gamma$  dendrites in *orion<sup>l</sup>* (asterisk in **n** compared to  
760 wild-type (**j**) at 18 h APF and the persistence of dendrite debris in *orion<sup>l</sup>* at 18 h APF (arrow in  
761 **n** as well as in adult (arrow in **o**). A confocal plane of a dendrite region containing larval  
762 dendrite debris (brilliant dots) is enclosed by a rectangle in **n**. **p**, The *orion<sup>l</sup>* unpruned dendritic  
763 phenotype is rescued by expression of *UAS-orion-B* at 18 h APF. All the pictures are confocal  
764 Z-projections (n is  $\geq$  8 for each developmental stage). Scale bars are 40  $\mu$ m. Genotypes are  
765 listed in Supplementary list of fly strains.

766

## Supplementary Fig. 2

### Presence of unpruned axons in $\geq$ one-week-old adults

**a**

|                  | MB | None | Weak | Strong |
|------------------|----|------|------|--------|
| WT               | 25 | 25   | 0    | 0      |
| Hr39             | 22 | 0    | 0    | 22     |
| orion $\Delta$ C | 22 | 0    | 22   | 0      |
| orion1           | 20 | 0    | 20   | 0      |
| orionRNAi        | 34 | 0    | 34   | 0      |
| drpr $\Delta$ 5  | 22 | 20   | 2    | 0      |

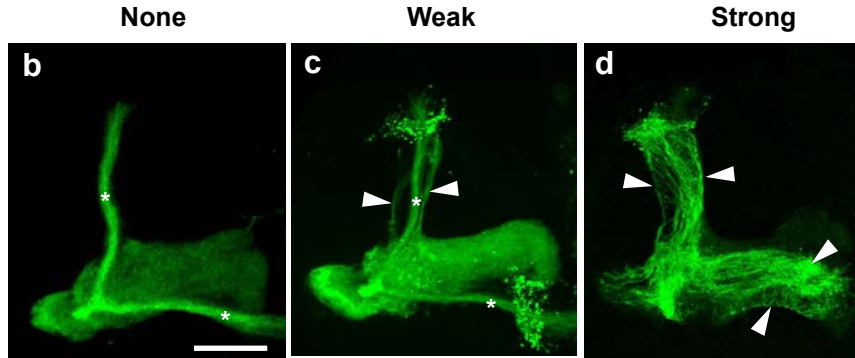

### Presence of axon debris in $\geq$ one-week-old adults

**e**

|                  | MB | None | Mild | Intermediary | Strong |
|------------------|----|------|------|--------------|--------|
| WT               | 25 | 25   | 0    | 0            | 0      |
| Hr39             | 22 | 0    | 0    | 0            | 0      |
| orion $\Delta$ C | 22 | 0    | 0    | 0            | 22     |
| orion1           | 20 | 0    | 0    | 0            | 20     |
| orionRNAi        | 34 | 34   | 0    | 0            | 0      |
| drpr $\Delta$ 5  | 22 | 16   | 2    | 2            | 2      |

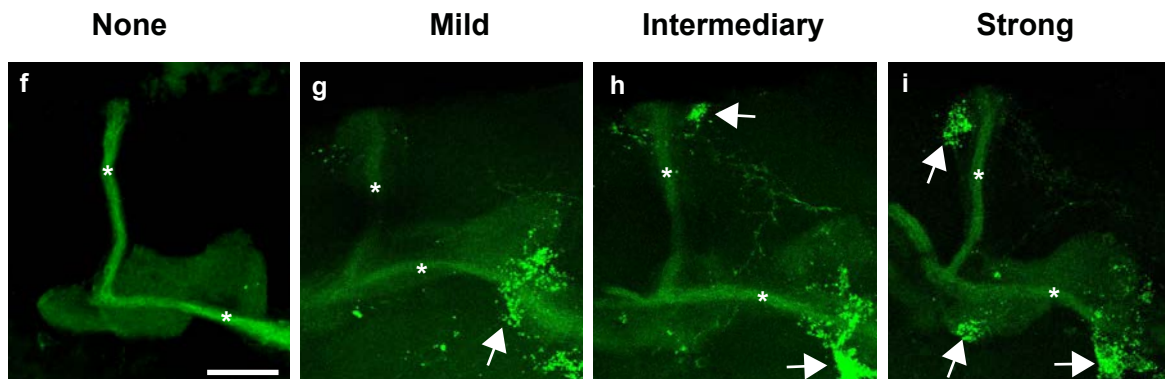

### Presence of axon debris in $\leq$ 2 h-old adults

**j**

|                  | MB | Scattered dots | Mild | Intermediary | Strong |
|------------------|----|----------------|------|--------------|--------|
| WT               | 10 | 10             | 0    | 0            | 0      |
| orion $\Delta$ C | 12 | 0              | 0    | 0            | 12     |
| drpr $\Delta$ 5  | 73 | 40             | 11   | 4            | 18     |

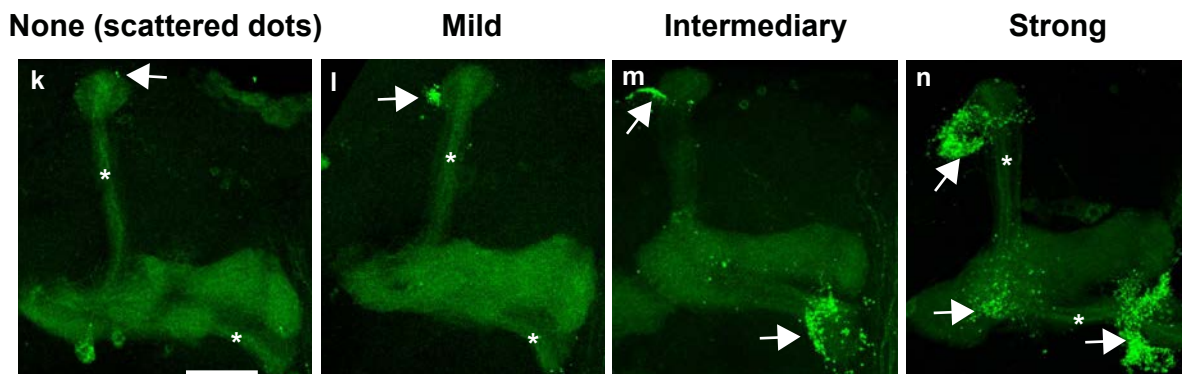



767 **Supplementary Fig. 2. Unpruned axons and axon debris phenotypes.** Tables **a**, **e** and **j** show  
768 quantitation of the unpruned axon (**a**) and axon debris (**e**, **j**) and are described in Table I.  $\gamma$   
769 neurons are visualized by the expression of *201Y-GAL4* driven *UAS-mCD8-GFP* (green). In  
770 adults, this *GAL4* line also labels the  $\alpha\beta$ -core axons indicated here by asterisks. Unpruned  
771 axons are labeled by arrowheads in **c** (“Weak”) and in **d** (“Strong”). Axon debris are ranked as  
772 “Scattered dots” (**k**), “Mild” (**g**, **l**), “Intermediate” (**h**, **m**) and “Strong” (**i**, **n**) and are labelled  
773 by arrows in **g-n**. These dots likely correspond to yet uncleared axon debris (**j**, **k**). Scale bars  
774 are 30  $\mu\text{m}$ . Genotypes are listed in Supplementary list of fly strains.  
775

### Supplementary Fig.3

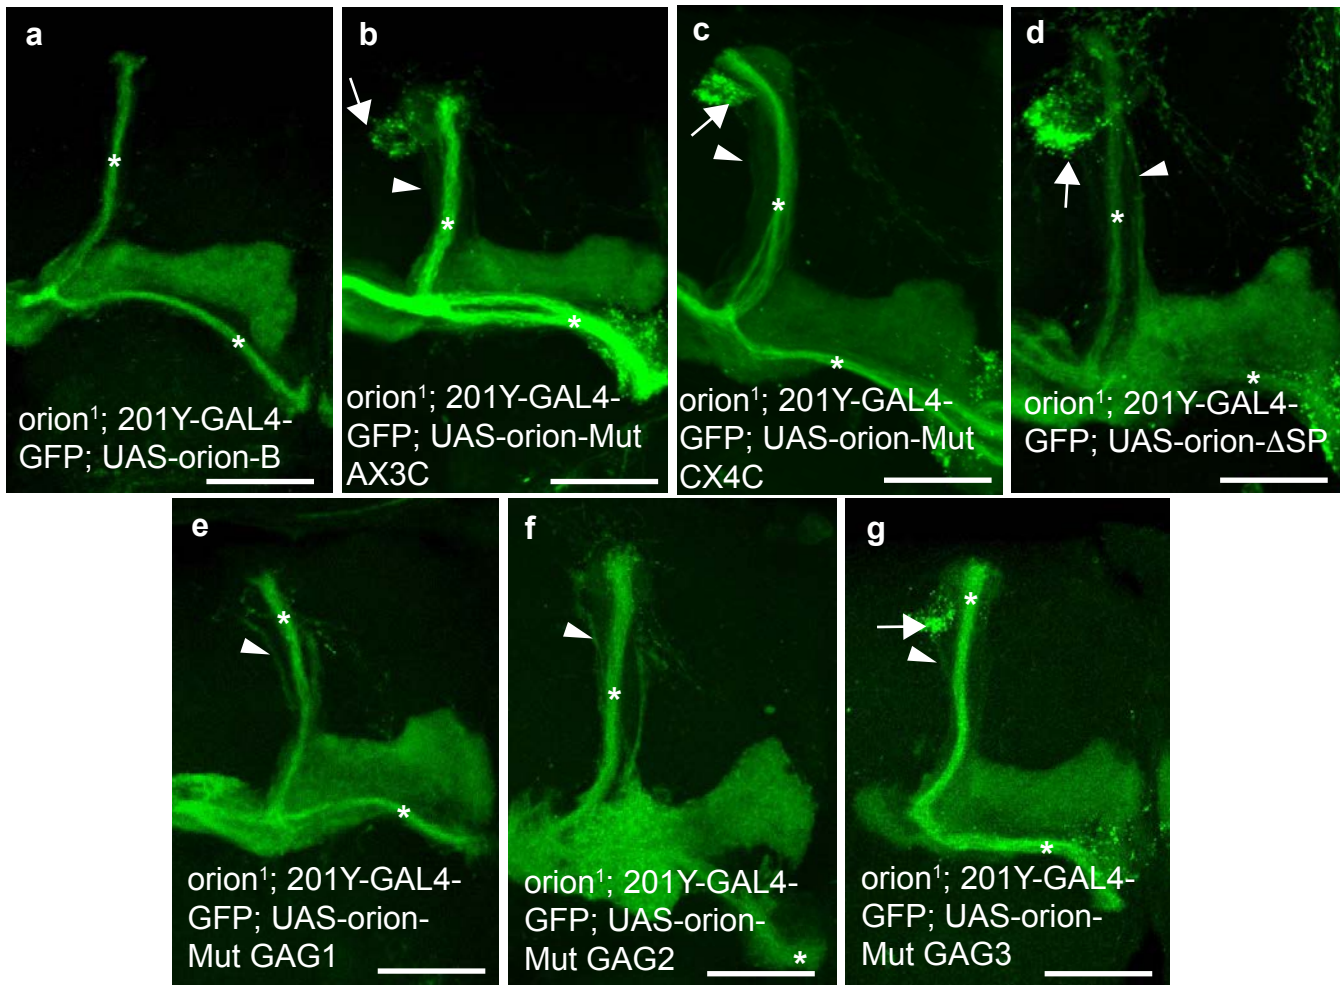

**h**

|                      | MB  | UP  | Debris | WT  |
|----------------------|-----|-----|--------|-----|
| control              | 100 | 0   | 0      | 100 |
| orion1               | 100 | 100 | 100    | 0   |
| orion1 + orion-B WT  | 387 | 0   | 0      | 387 |
| orion1 + ΔSP         | 27  | 27  | 27     | 0   |
| orion1 + AX3C        | 20  | 20  | 20     | 0   |
| orion1 + CX4C        | 20  | 20  | 20     | 0   |
| orion1 + GAG1        | 106 | 46  | 0      | 60  |
| orion1 + GAG2        | 122 | 52  | 0      | 70  |
| orion1 + GAG3        | 118 | 112 | 112    | 6   |
| orion-RNAi           | 34  | 34  | 0      | 0   |
| orion-RNAi + EcRB1   | 26  | 2   | 0      | 24  |
| orion-RNAi + control | 20  | 20  | 0      | 0   |

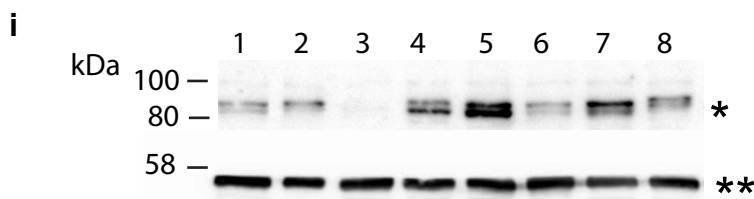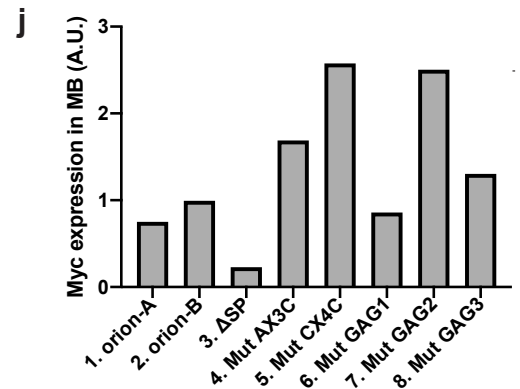

776 **Supplementary Fig. 3. The CX<sub>3</sub>C motif, the GAGs sites and the SP domain are required**  
777 **for the Orion pruning function. a-g**, The expression of *201Y-GAL4* driven *UAS-mCD8-GFP*  
778 (green) is shown in adult MBs in which expression of wild-type *UAS-orion-B* (**a**) (n = 387  
779 MBs) or *UAS-orion-B* containing different mutations (Mut, **b-g**) was induced in *orion<sup>1</sup>*. *UAS-*  
780 *orion-B* contains each of the following mutations: at the CX<sub>3</sub>C site (AX<sub>3</sub>C in **b**, n = 20 MBs;  
781 CX<sub>4</sub>C in **c**, n = 20 MBs), absence of signal peptide ( $\Delta$ SP in **d**, n = 27 MBs), at the GAG1 site  
782 (EKRTERTLKILKD into EAATEATLAILAD in **e**, n = 106 MBs), at the GAG2 site  
783 (VKRNRV into VAANAV in **f**, n = 122 MBs), at the GAG3 site (ARREKLRL into  
784 AAAEALAL in **g**, n = 118 MBs). Unpruned  $\gamma$  axons are labelled by arrowheads, uncleared  
785 debris are labelled by arrows and  $\alpha\beta$  core axons are labeled by asterisks. Note that debris are  
786 absent in **e** and **f**. Scale bars are 40  $\mu$ m. **h**, Quantitation of the phenotypes are shown. MB: total  
787 number of MBs analyzed; UP: number of MBs containing unpruned  $\gamma$  axons; Debris: number  
788 of MBs containing uncleared debris; WT: number of wild-type looking MBs. Genotypes are  
789 listed in Supplementary list of fly strains. **i**, Western blot, incubated with an anti-Myc antibody,  
790 displaying the Orion-Myc expression levels (single asterisk) produced by the different *UAS-*  
791 *orion-myc* constructs driven by *201Y-GAL4* and the tubulin levels in each genotype (double  
792 asterisk) as a control. Proteins were extracted from L3 brains. Lane 1: *orion-A*; lane 2: *orion-*  
793 *B*; lane 3: *orion-B- $\Delta$ SP*; lane 4: *orion-B-Mut AX<sub>3</sub>C*; line 5: *orion-B-Mut CX<sub>4</sub>C*; line 6: *orion-*  
794 *B-Mut GAG1*; lane 7: *orion-B-Mut GAG2*; lane 8: *orion-B-Mut GAG3*. **j**, Orion-Myc band  
795 expression levels are shown in arbitrary units (A.U.) which are calculated as a ratio of the Myc  
796 level to the loading control tubulin level for each genotype. Note that all of the proteins are  
797 expressed at similar or higher levels relative to Orion-B except Orion- $\Delta$ SP whose expression is  
798 lower likely due to protein destabilization resulting from the lack of the signal peptide.  
799

## Supplementary Fig.4

A

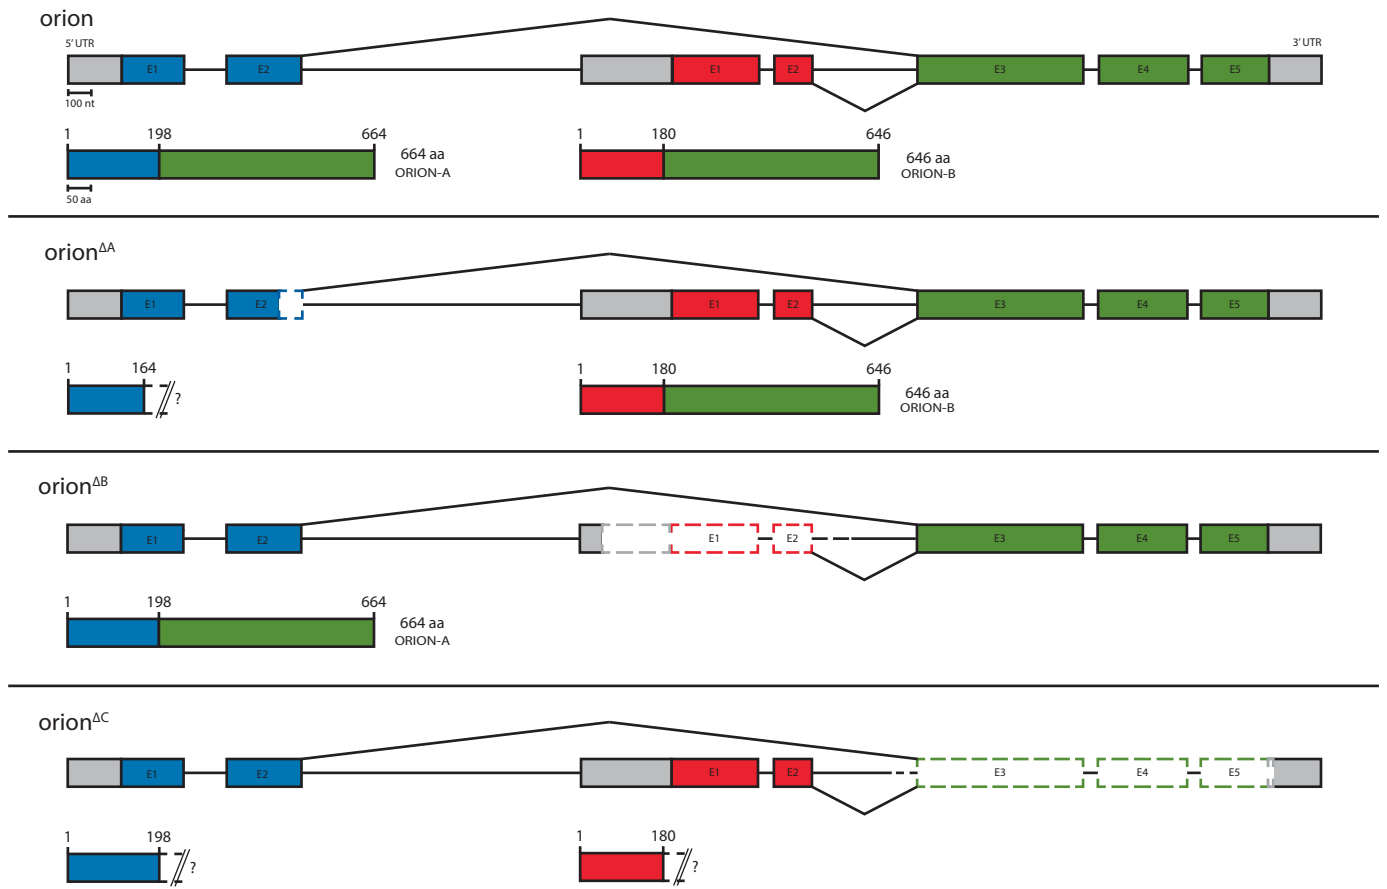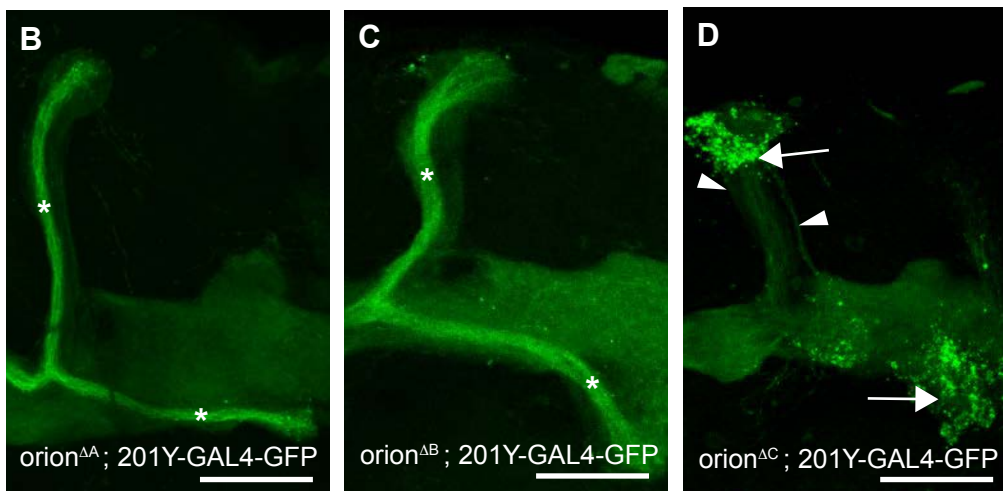

800 **Supplementary Fig. 4. Deletion of the common region of *orion* induces a  $\gamma$  axon pruning**  
801 **phenotype.** The *orion* gene (CG2206) lies within the large intron of *Ubr3* and is referenced as  
802 *l(1)G0193* although the lethality is clearly not due to the lack of *orion* function (see text) but  
803 likely to some splicing defect of the *Ubr3* mRNA induced by the insertion of transposable  
804 elements. **a**, Schematic representation of *orion* genomic DNA and its two Orion isoforms in  
805 wild-type and in the three different CRISPR induced *orion* deletions ( $\Delta A$ ,  $\Delta B$  and  $\Delta C$ ) and their  
806 corresponding Orion isoforms. **b-d**, Confocal Z-projections of adult MB are revealed by *201Y-*  
807 *GAL4*-driven *UAS-mCD8-GFP* expression (green) in the three *orion* CRISPR mutants: *orion* <sup>$\Delta A$</sup> ,  
808 *orion* <sup>$\Delta B$</sup>  and *orion* <sup>$\Delta C$</sup>  (n = 87, 70 and 98 MBs respectively). Only *orion* <sup>$\Delta C$</sup>  displays an unpruned  
809  $\gamma$  axon mutant phenotype characterized by unfragmented  $\gamma$  axons (arrowhead) and uncleared  
810 debris (arrow).  $\alpha\beta$  core axons are labeled by asterisks in **b** and **c** where they are clearly  
811 discernible. Scale bars are 40  $\mu$ m. Genotypes are listed in Supplementary list of fly strains.  
812  
813

## Supplementary Fig.5

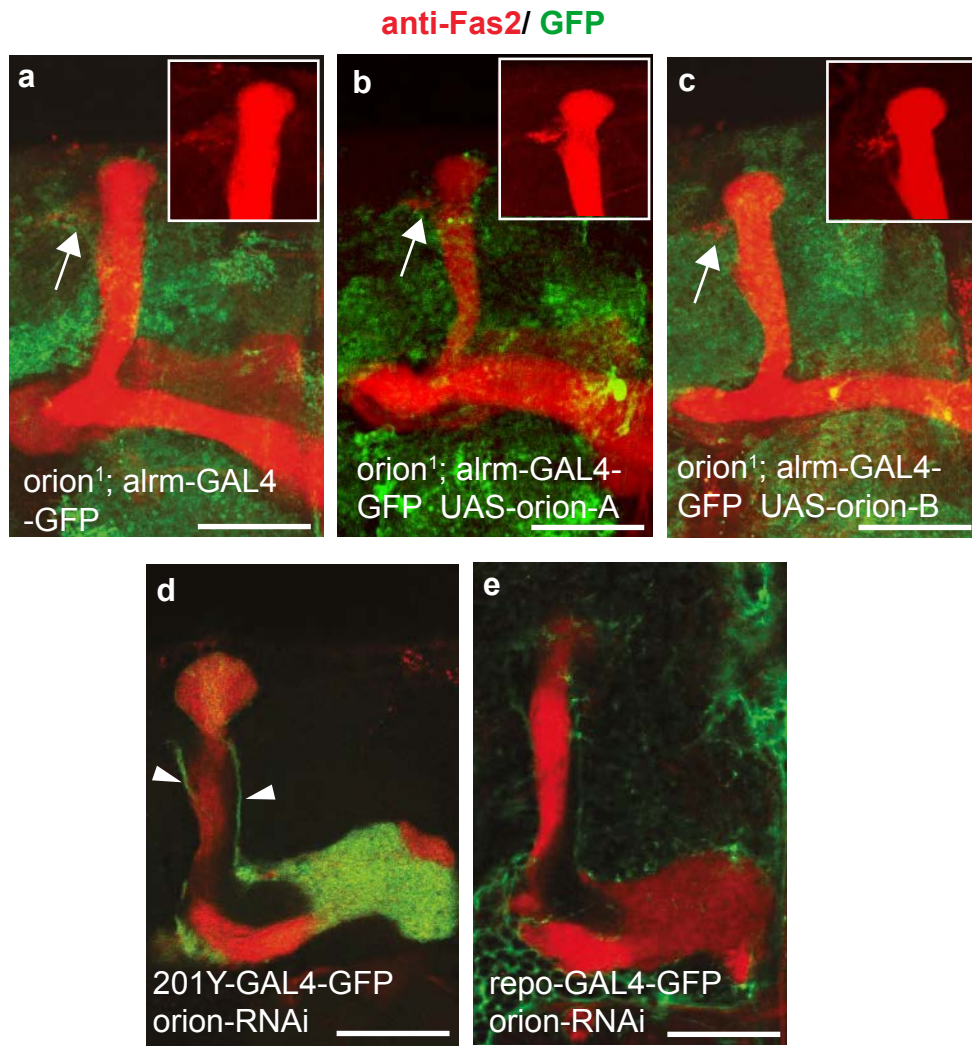



814 **Supplementary Fig. 5. Expression of Orion in glia does not rescue the *orion*<sup>1</sup> pruning**  
815 **defect and downregulating Orion expression in wild-type glia does not affect pruning. a-**  
816 **c,** Confocal Z-projections showing merged *alm-GAL4*-driven *UAS-mCD8-GFP* (green) and  
817 anti-Fas2 staining (red) in *orion*<sup>1</sup> adult MBs. Expression of *orion-A* (b) or *orion-B* (c) in  
818 astrocytes (*alm-GAL4*) does not rescue the *orion*<sup>1</sup> mutant phenotype. A rectangle containing  
819 anti-Fas2 staining (red) is shown in a-c. Arrows point to unpruned  $\gamma$  axons and debris labelled  
820 by anti-Fas2 (a-c). d, Confocal plane showing *201Y-GAL4*-driven *UAS-mCD8-GFP* (green)  
821 and anti-Fas2 staining (red) in adult MBs. Expression of an *UAS-orion-RNAi* in MB neurons  
822 results in an unpruned  $\gamma$  axon phenotype (arrowheads). e, Confocal plane showing *repo-GAL4*-  
823 driven *UAS-mCD8-GFP* (green) and anti-Fas2 staining (red) in adult MBs. Expression of *orion*-  
824 RNAi in glia does not result in unpruned  $\gamma$  axon phenotypes. Scale bars are 40  $\mu$ m and number  
825 of MBs is  $\geq 20$  (a, n = 20; b, n = 20; c, n = 30; d, n = 20; e, n = 36 MBs). Genotypes are listed  
826 in Supplementary list of fly strains.  
827

## Supplementary Fig.6

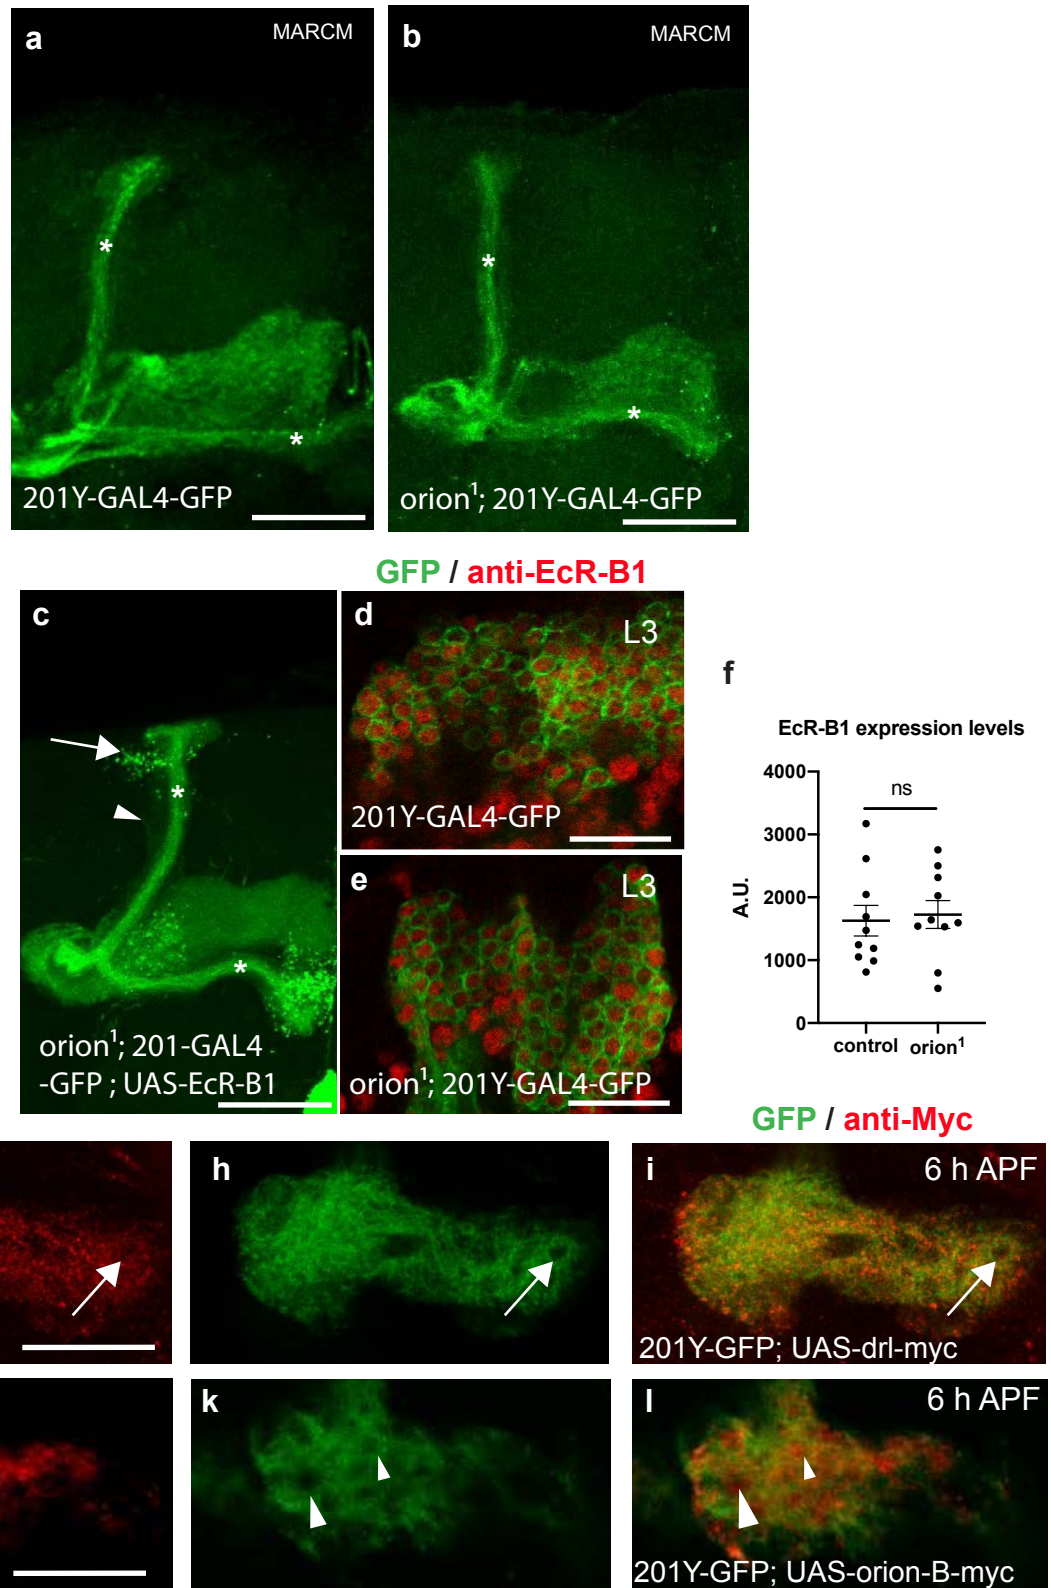

828 **Supplementary Fig. 6. Orion is a secreted protein with a non-cell-autonomous function in**  
829  **$\gamma$  axons. a-l**, The expression of *201Y-GAL4* driven *UAS-GFP* (green) reveals  $\gamma$  neurons. In adult  
830 (a-c), L3 (d, e) and 6 h APF (g-l). a, b, MARCM neuroblast clones displaying wild-type  $\gamma$  axon  
831 pruning are shown. A wild-type control (a) and an *orion*<sup>1</sup> (b) (n = 20 wild-type and 30 *orion*<sup>1</sup>  
832 neuroblast clones). c, *EcR-B1* expression in *orion*<sup>1</sup>  $\gamma$  neurons does not rescue the *orion*<sup>1</sup>  
833 phenotype. Note the presence of  $\gamma$  remnant debris (arrow) and unpruned axons (arrowhead) (n  
834 = 40 MBs). d, e, Mushroom body cell body region showing ECR-B1 expression (red staining)  
835 in wild-type (d) and *orion*<sup>1</sup> (e). f, Quantitation of EcR-B1 signal in  $\gamma$  neuron cell bodies in  
836 arbitrary units (A.U.) reveals no significant differences between control and *orion*<sup>1</sup> (n = 10 MBs  
837 for control and for *orion*<sup>1</sup>; p = 0.67 (Mann-Whitney *U* test)). These interaction analyses support  
838 *orion* being genetically downstream of *EcR-B1*. g-l, Expression of the transmembrane receptor  
839 *drl-myc* (g-i, n = 10) and *orion-B-myc* (j-l, n = 10) in MBs. Red represents anti-myc staining.  
840 Drl-myc staining is absent in hole-like structures (arrows in g-i). However secreted Orion-myc  
841 is present in these structures (arrowheads in j-l). Images are confocal Z-projections, except for  
842 g-l which are confocal planes. Scale bars are 40  $\mu$ m in a-c and g-l and 20  $\mu$ m in d and e.  
843 Genotypes are listed in Supplementary list of fly strains.

## Supplementary Fig.7

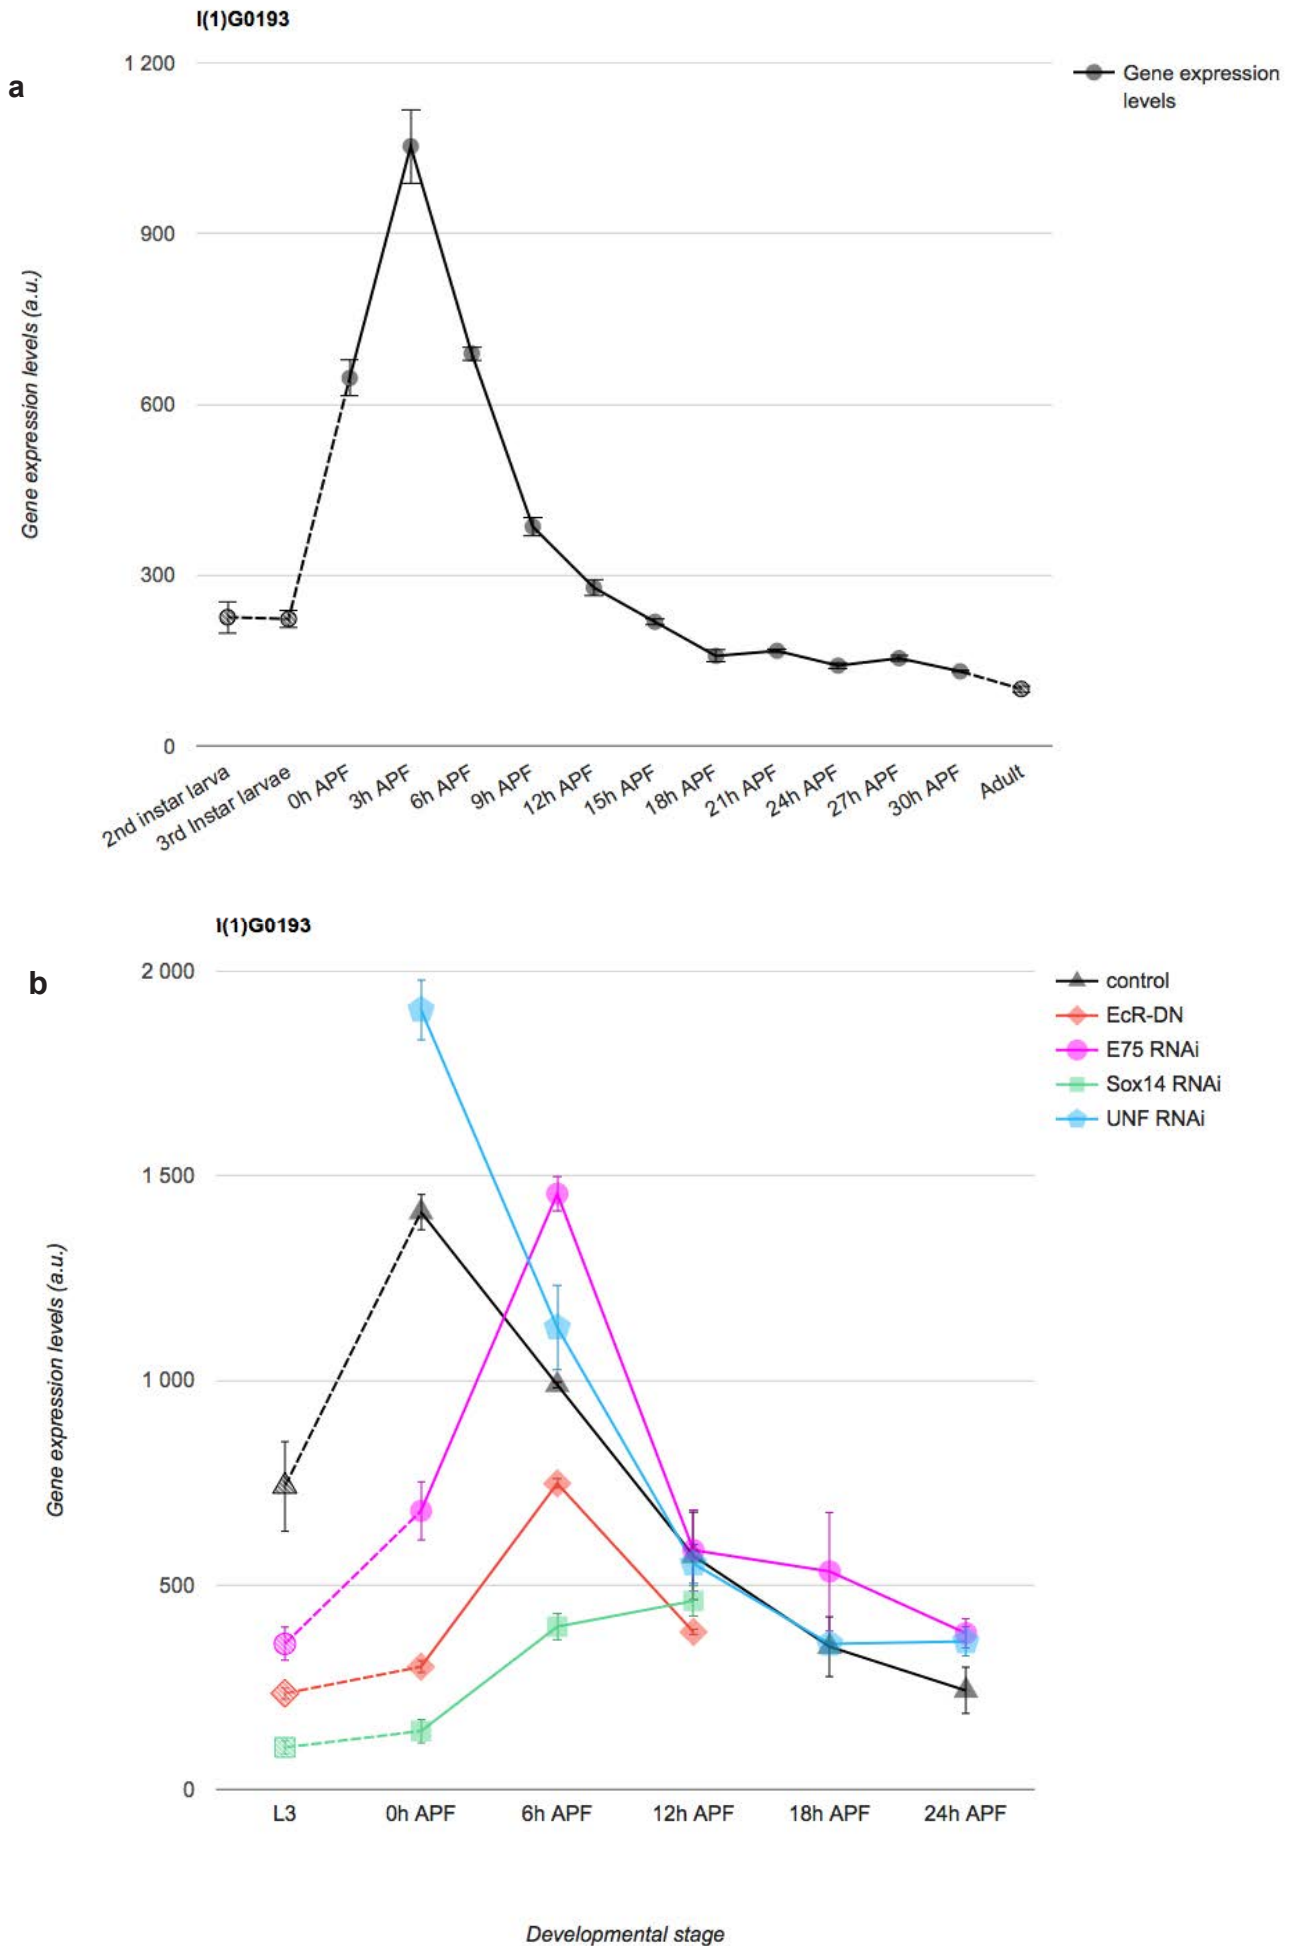

844 **Supplementary Fig. 7. *orion* mRNA is expressed at the time of pruning in  $\gamma$  neurons and**  
845 **its expression is EcR-B1 regulated. a, b, Data showing *orion* mRNA  $\gamma$  neuron-expression**  
846 **levels in arbitrary units (a.u.) during development in wild-type (a) and in different mutant**  
847 **backgrounds (b), downloaded from Oren Schuldiner's laboratory's public web site**  
848 **(<http://www.weizmann.ac.il/mcb/Schuldiner/resources>)<sup>24</sup>. Note that the peak of expression of**  
849 ***orion* is at 3 h APF which is the timepoint at which pruning initiates (a). We also note that just**  
850 **before and during the pruning process (0-6 h APF) *orion* mRNA expression (black line in b) is**  
851 **regulated by *EcR-B1* and *Sox14*.**  
852



Supplementary Fig.8

anti-Fas2 / GFP

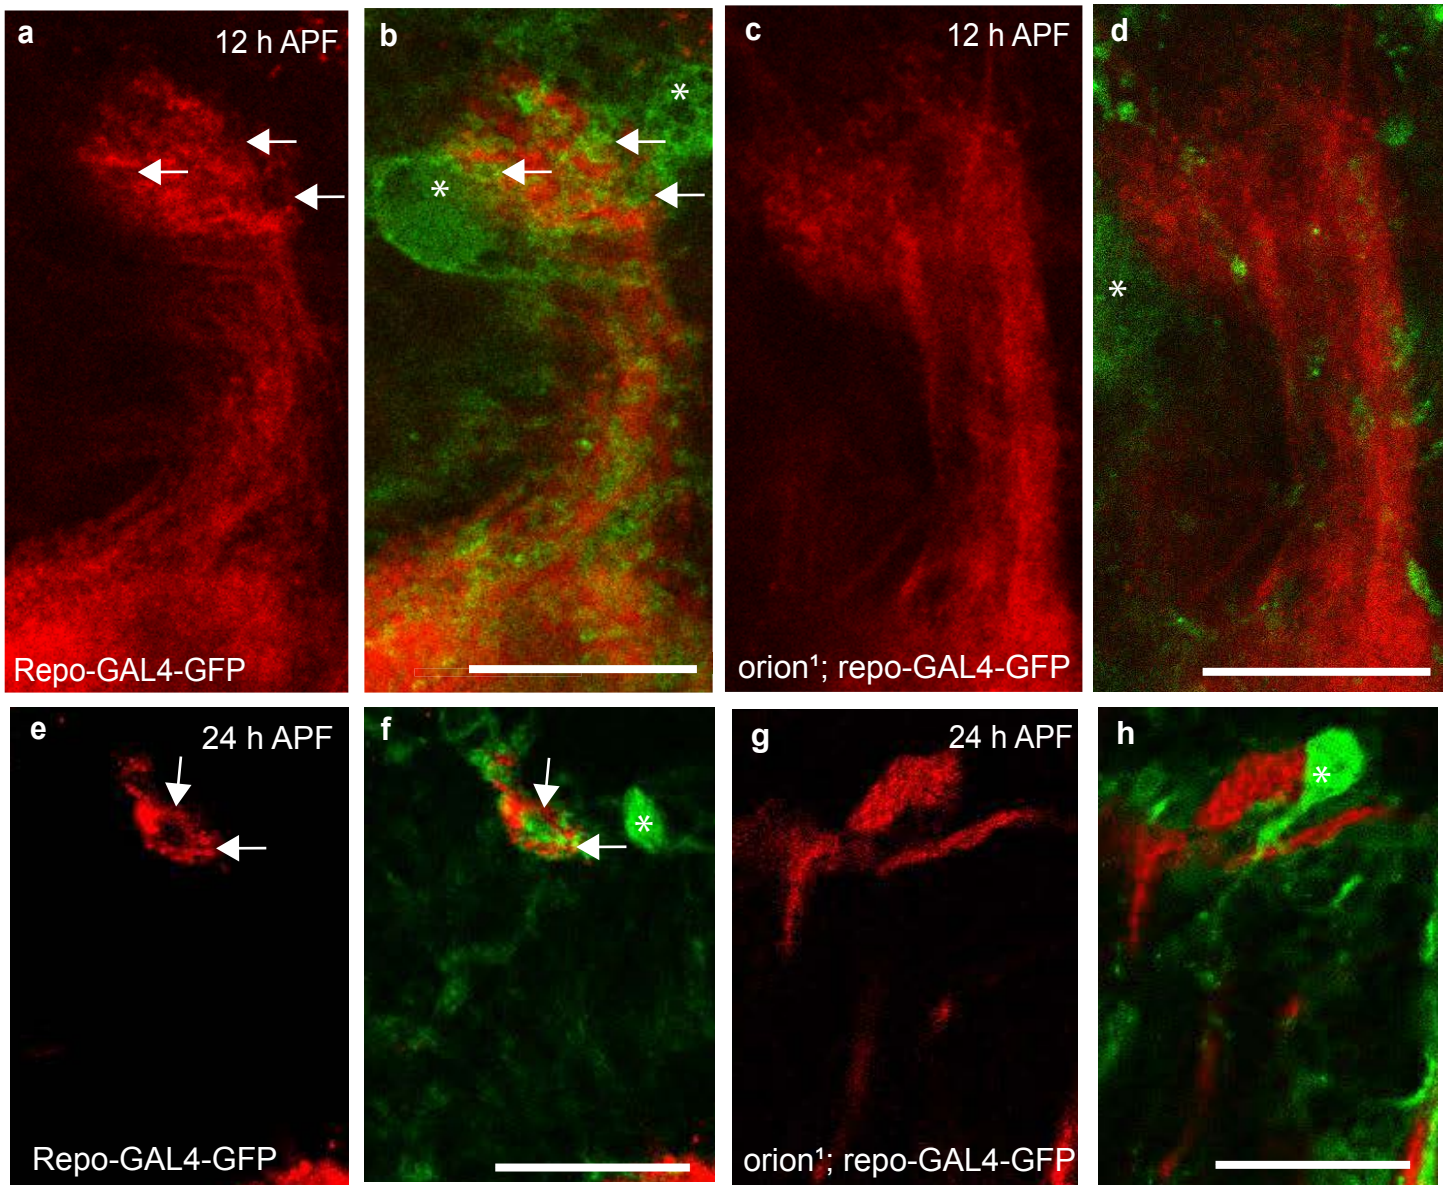

anti-Fas2 / anti-REPO / GFP

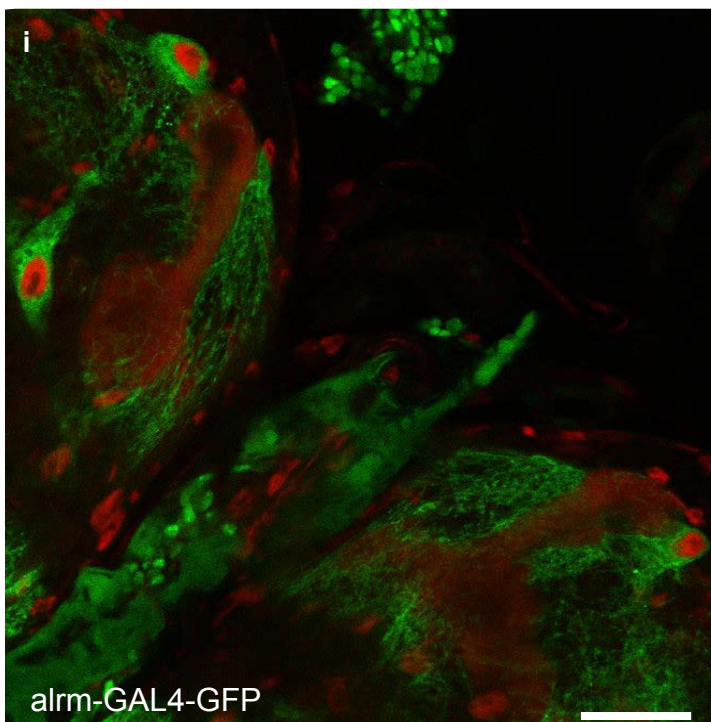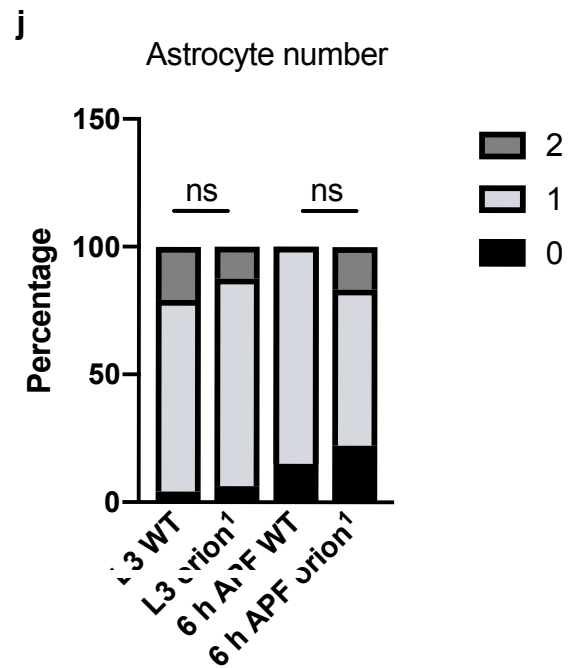



853 **Supplementary Fig. 8. Orion is required for the infiltration of astrocytes into the MB  $\gamma$**   
854 **bundle during development and its mutation does not alter the number of astrocytes**  
855 **surrounding the  $\gamma$  axons.**

856 **a-h**, Confocal Z-projections of 12 h and 24 h APF brains expressing *repo-GAL4*-driven *UAS-*  
857 *mCD8-GFP* (green) in controls (**a, b** for 12 h APF and **e, f** for 24 h APF) and *orion<sup>1</sup>* (**c, d** for  
858 12 h APF and **g, h** for 24 h APF) focused on the MB dorsal lobe (n = 10 control MBs and n =  
859 10 *orion<sup>1</sup>* MBs). Anti-Fas2 staining (red) reveals spherical hole-like structures occupied by glial  
860 processes infiltrating into the  $\gamma$  bundle (green, arrows) in wild-type (**a, b** and **e, f**) but not in  
861 *orion<sup>1</sup>* individuals (**c, d** and **g, h**). Note the significant infiltration of the  $\gamma$  bundle by two  
862 astrocytes in **b** (asterisk) and the absence of axon bundle infiltration by a closely apposed  
863 astrocyte in **d** (asterisk). Nevertheless, the global aspect of the  $\gamma$  bundle where the fragmentation  
864 is taking place looks similar in wild-type and mutant at 12 h APF. This suggests that, in *orion*  
865 mutant, fragmenting  $\gamma$  axons are not actively being engulfed by astrocytes. Scale bars are 20  
866  $\mu\text{m}$ . **i**, Confocal Z-projection showing *UAS-mCD8-GFP* expression (green) in astrocytes driven  
867 by *alrm-GAL4* at L3. Red shows both glial cell nuclei labelled by an anti-Repo antibody and  
868 MBs labelled by anti-Fas2. Scale bars are 40  $\mu\text{m}$ . **j**, Percentage of astrocytes surrounding the  $\gamma$   
869 vertical lobe at L3 and at 6 h APF in wild-type and *orion<sup>1</sup>* (for L3, n = 24 wild-type MBs and n  
870 = 16 *orion<sup>1</sup>* MBs; for 6 h APF, n = 20 wild-type MBs and n = 18 *orion<sup>1</sup>* MBs). No statistically-  
871 significant differences were observed between the two groups (Fisher's exact test p = 0.84 for  
872 L3 and p = 0.12 for 6 h APF). Scale bar is 30  $\mu\text{m}$ . Genotypes are listed in Supplementary list  
873 of fly strains.

874  
875  
876  
877  
878

## Supplementary Fig.9

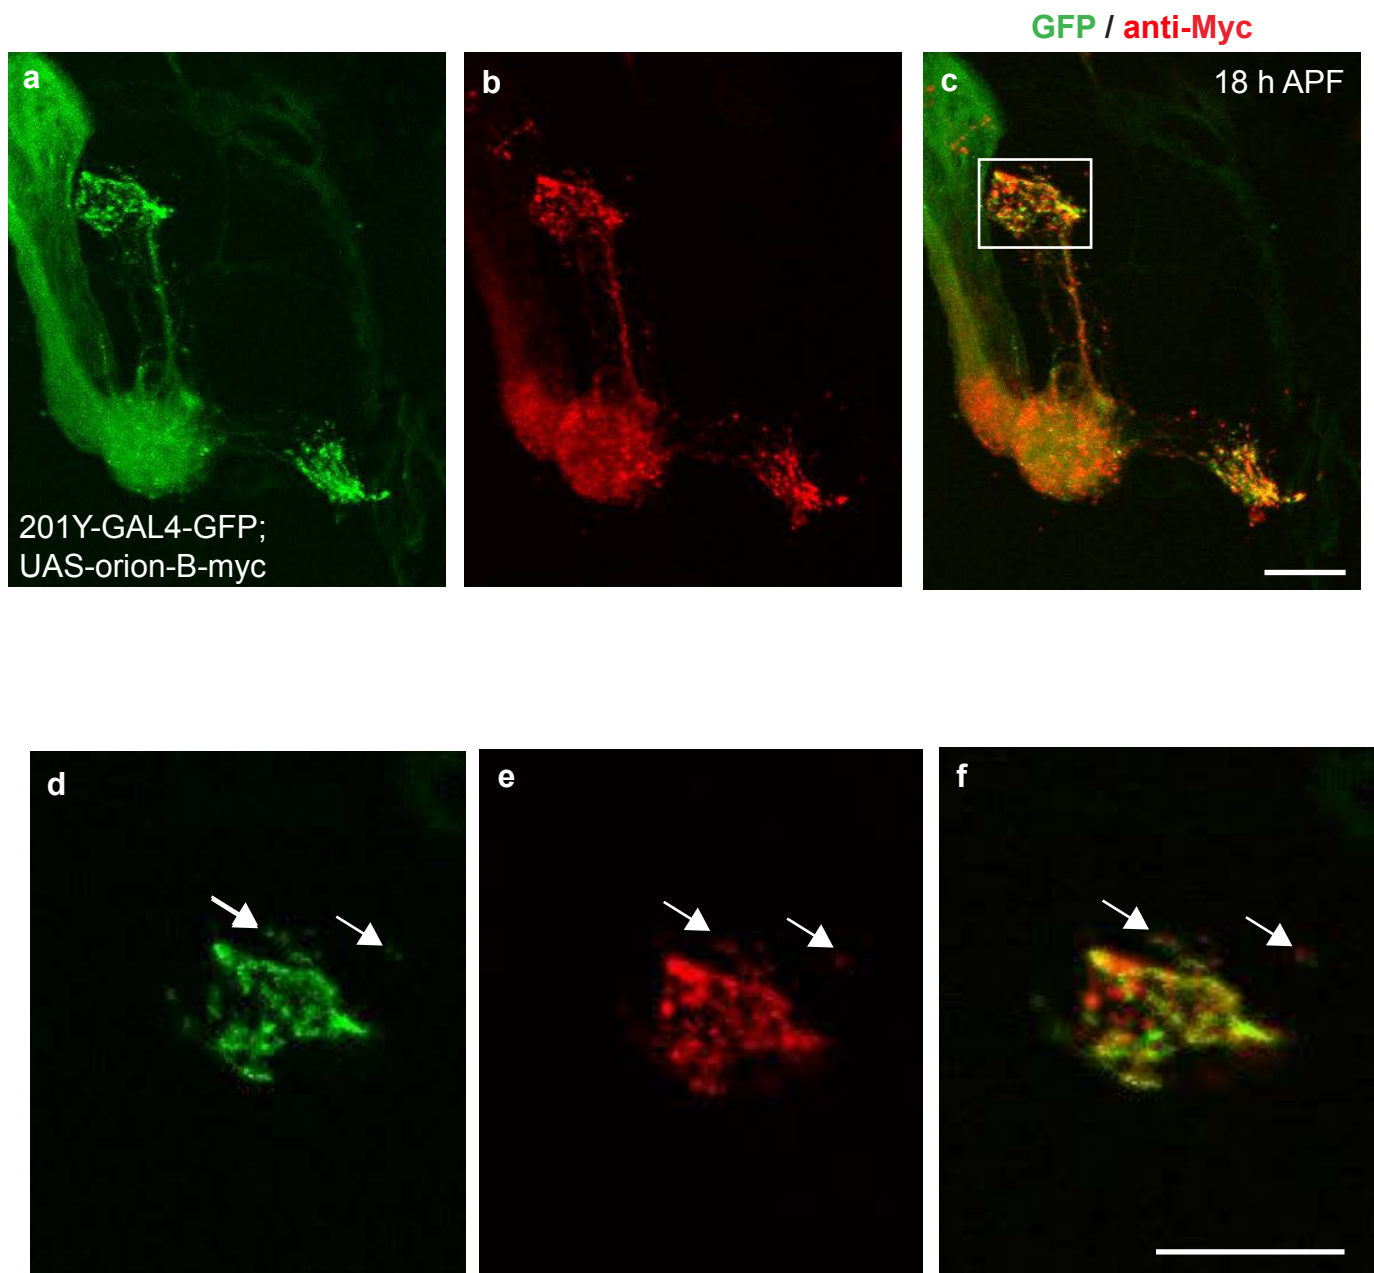

879 **Supplementary Fig. 9. Orion is associated with membranes. a-c**, Expression of *UAS-mCD8-*  
880 *GFP* (green) and *UAS-orion-B-myc* (red) under the control of *201Y-GAL4* is shown in 18 h  
881 APF  $\gamma$  neurons (n = 6). **d-f**, (confocal planes) are higher magnifications of the **a-c** (confocal Z-  
882 projections) regions enclosed by rectangles. Some debris staining for both GFP and Orion-Myc  
883 is labelled by arrows. Scale bars are 20  $\mu$ m. Genotypes are listed in Supplementary list of fly  
884 strains.

## Supplementary Fig.10

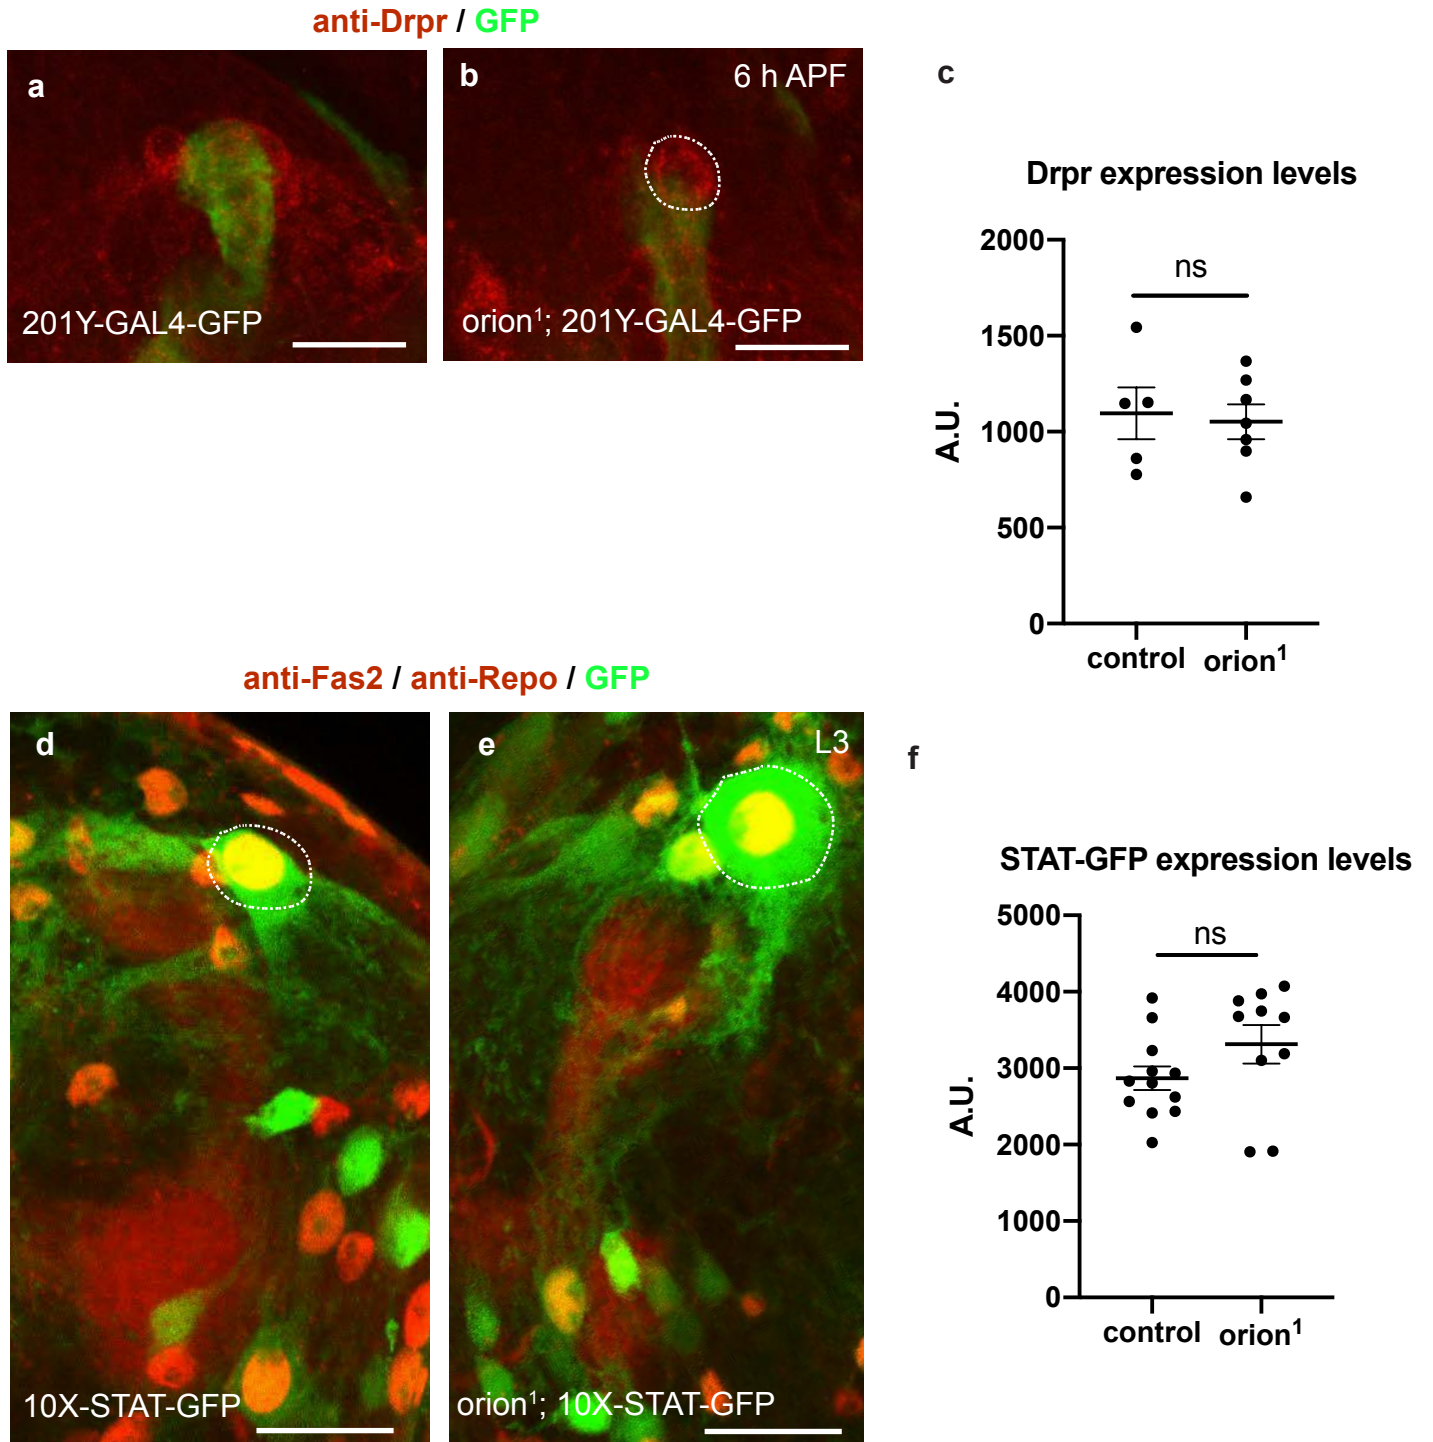

885 **Supplementary Fig. 10. *orion*<sup>1</sup> mutants display wild-type levels of Drpr protein expression**  
886 **and wild-type activity of the *drpr* transcriptional regulator STAT92E.** Since *drpr*  
887 expression is regulated by known axon degeneration cues<sup>30,45</sup> and the *drpr*<sup>Δ5</sup> and *orion*<sup>1</sup> alleles  
888 display mutant phenotypes that share some features (Supplementary Fig.1), we analyzed Drpr  
889 expression in wild-type and *orion*<sup>1</sup>. **a-c**, Expression of Drpr (red) in wild-type control (**a**) and  
890 *orion*<sup>1</sup> (**b**) in 6 h APF brains and the corresponding quantitation in arbitrary units (A.U.) in  
891 astrocytes (**c**). Green corresponds to the expression of *201Y-GAL4* driven *UAS-mCD8-GFP* in  
892  $\gamma$  axons. The astrocyte cytoplasm, in which quantitation are performed, is circled by a white  
893 dotted line in **a** and **b**. **c**, Quantitation of Drpr expression in arbitrary units (A.U.) reveals no  
894 significant differences between control and *orion*<sup>1</sup>. Results are means  $\pm$  S.E.M. n = 5 MBs for  
895 control and 7 MBs for *orion*<sup>1</sup>; p = 1 (Mann-Whitney *U* test). In addition, since *drpr* expression  
896 is regulated by the transcription factor STAT92E<sup>46</sup>, we analyzed the expression of an *STAT92E-*  
897 *GFP* reporter in wild-type and *orion*<sup>1</sup>. **d-f**, Expression of 10X-STAT92E-GFP (green) in wild-  
898 type control (**d**) and *orion*<sup>1</sup> (**e**) larval brains and the corresponding quantitation in arbitrary units  
899 (A.U.) (**f**). Red is both, Fas2 labelling  $\gamma$  axon bundles and Repo antibody labelling the glial cell  
900 nuclei. Pictures are confocal Z-projections. The astrocyte cytoplasm, in which quantitation are  
901 performed, is circled by a white dotted line in **d** and **e**. **f**, Quantitation of STAT-GFP expression  
902 in arbitrary units (A.U.) reveals no significant differences between control and *orion*<sup>1</sup>. Results  
903 are means  $\pm$  S.E.M. n = 12 MBs for control and 10 MBs for *orion*<sup>1</sup>; p = 0.09 (Mann-Whitney  
904 *U* test). Scale bars are 30  $\mu$ m in **a**, **b** and 20  $\mu$ m in **d**, **e**. Genotypes are listed in Supplementary  
905 list of fly strains.  
906

907 **Supplementary list of fly strains:**

908

909 **Fig. 1: a, c-e,**  $y w^{67c23} / Y$  or  $y w^{67c23} / y w^{67c23}$ ;  $UAS-mCD8GFP 201Y-GAL4/+$ . **b, f-i,**  $y w^{67c23}$   
910  $sn^3 orion^1 FRT19A / Y$  or  $y w^{67c23} sn^3 orion^1 FRT19A / y w^{67c23} sn^3 orion^1 FRT19A$ ;  $UAS-$   
911  $mCD8GFP 201Y-GAL4 / +$ . **j,**  $y w^{67c23} sn^3 orion^1 FRT19A / Y$ ;  $UAS-mCD8GFP 201Y-GAL4/+$ ;  
912  $UAS-orion-A-myc / +$ . **k,**  $y w^{67c23} sn^3 orion^1 FRT19A / Y$ ;  $UAS-mCD8GFP 201Y-GAL4 / +$ ;  
913  $UAS-orion-B-myc / +$ . **l,**  $y w^{67c23} / Y$  or  $y w^{67c23} / w^{1118}$ ;  $UAS-mCD8GFP 201Y-GAL4 / UAS-$   
914  $orion-RNAi$ .

915

916 **Fig. 3: a, b, d, e, g, h, j, k,**  $y w^{67c23} / Y$  or  $y w^{67c23} / y w^*$ ;  $UAS-mCD8GFP 201Y-GAL4 / +$  ;  
917  $UAS-orion-B-myc / +$ . **c, f, i,**  $y w^{67c23} / Y$  or  $y w^{67c23} / y w^*$ ;  $UAS-mCD8GFP 201Y-GAL4 / +$  ;  
918  $UAS-orion-B-\Delta SP-myc / +$ .

919

920 **Fig. 4: a, b,**  $y w^{67c23} sn^3 FRT19A / Y$  ;  $repo-GAL4 UAS-mCD8GFP / +$ . **c,**  $y w^{67c23} sn^3 orion^1$   
921  $FRT19A / Y$  ;  $repo-GAL4 UAS-mCD8GFP / +$ . **d-g,**  $y w^{67c23} / Y$  or  $y w^{67c23} / y w^*$  ;  $UAS-$   
922  $mCD8GFP 201Y-GAL4 / +$  ;  $UAS-orion-B-myc / +$ . **h,**  $y w^{67c23} / Y$  or  $y w^{67c23} / y w^*$ ;  $UAS-$   
923  $mCD8GFP 201Y-GAL4 / +$  ;  $UAS-orion-B-\Delta SP-myc / +$ .

924

925 **Supplementary Fig. 1: a, e, h-k,**  $y w^{67c23} / Y$  or  $y w^{67c23} / y w^{67c23}$ ;  $UAS-mCD8GFP 201Y-GAL4$   
926  $/ +$ . **b, l-o,**  $y w^{67c23} sn^3 orion^1 FRT19A / Y$  or  $y w^{67c23} sn^3 orion^1 FRT19A / y w^{67c23} sn^3 orion^1$  ;  
927  $UAS-mCD8GFP 201Y-GAL4 / +$ . **c,**  $y w^{67c23} / Y$  or  $y w^{67c23} / y w^{67c23}$  ;  $UAS-mCD8GFP 201Y-$   
928  $GAL4 / +$  ;  $drpr^{\Delta 5} / drpr^{\Delta 5}$ . **d, g,**  $y w^{67c23} / Y$  or  $y w^{67c23} / y w^{67c23}$ ;  $Hr39^{C13}$ ,  $UAS-mCD8GFP$   
929  $201Y-GAL4 / +$ . **f,**  $y w^* orion^{\Delta C} / Y$  ;  $UAS-mCD8GFP 201Y-GAL4 / +$ . **p,**  $y w^{67c23} sn^3 orion^1$   
930  $FRT19A / Y$  ;  $UAS-mCD8GFP 201Y-GAL4 / +$  ;  $UAS-orion-B-myc / +$ .

931

932 **Supplementary Fig. 2: a, e and j. WT:**  $y w^{67c23} / Y$ ;  $UAS-mCD8GFP 201Y-GAL4 / +$ . **Hr39:**  
933  $y w^{67c23} / Y$ ;  $Hr39^{C13}$ ,  $UAS-mCD8GFP 201Y-GAL4 / +$ . **orion $\Delta$ C:**  $y w^* orion^{\Delta C} / Y$  ;  $UAS-$   
934  $mCD8GFP 201Y-GAL4 / +$ . **orion1:**  $y w^{67c23} sn^3 orion^1 FRT19A / Y$  ;  $UAS-mCD8GFP 201Y-$   
935  $GAL4 / +$ . **orionRNAi:**  $y w^{67c23} / Y$ ;  $UAS-mCD8GFP 201Y-GAL4 / UAS-orion-RNAi$ . **drpr $\Delta$ 5:**  
936  $y w^{67c23} / Y$ ;  $UAS-mCD8GFP 201Y-GAL4 / +$  ;  $drpr^{\Delta 5} / drpr^{\Delta 5}$ . **b, f,**  $y w^{67c23} / Y$ ;  $UAS-$   
937  $mCD8GFP 201Y-GAL4 / +$ . **c,**  $y w^{67c23} sn^3 orion^1 FRT19A / Y$  ;  $UAS-mCD8GFP 201Y-GAL4$   
938  $/ +$ . **d:**  $y w^{67c23} / Y$ ;  $Hr39^{C13}$ ,  $UAS-mCD8GFP 201Y-GAL4 / +$ . **g-i, k-m,**  $UAS-mCD8GFP 201Y-$   
939  $GAL4 / +$  ;  $drpr^{\Delta 5} / drpr^{\Delta 5}$ . **n,**  $y w^* orion^{\Delta C} / Y$  ;  $UAS-mCD8GFP 201Y-GAL4 / +$ .

940



941 **Supplementary Fig. 3: a**,  $y w^{67c23} sn^3 orion^1 FRT19A / Y$ ;  $UAS-mCD8GFP 201Y-GAL4 / +$ ;  
942  $UAS-orion-B-myc / +$ . **b**,  $y w^{67c23} sn^3 orion^1 FRT19A / Y$ ;  $UAS-mCD8GFP 201Y-GAL4 / +$ ;  
943  $UAS-orion-B- Mut AX3C-myc / +$ . **c**,  $y w^{67c23} sn^3 orion^1 FRT19A / Y$ ;  $UAS-mCD8GFP 201Y-$   
944  $GAL4 / +$ ;  $UAS-orion-B-Mut CX4C-myc- / +$ . **d**,  $y w^{67c23} sn^3 orion^1 FRT19A / Y$ ;  $UAS-$   
945  $mCD8GFP 201Y-GAL4 / +$ ;  $UAS-orion-B-\Delta SP-myc / +$ . **e**,  $y w^{67c23} sn^3 orion^1 FRT19A / Y$ ;  
946  $UAS-mCD8GFP 201Y-GAL4 / +$ ;  $UAS-orion-B-Mut GAG1-myc / +$ . **f**,  $y w^{67c23} sn^3 orion^1$   
947  $FRT19A / Y$ ;  $UAS-mCD8GFP 201Y-GAL4 / +$ ;  $UAS-orion-B-Mut GAG2-myc / +$ . **g**,  $y w^{67c23}$   
948  $sn^3 orion^1 FRT19A / Y$ ;  $UAS-mCD8GFP 201Y-GAL4 / +$ ;  $UAS-orion-B-Mut GAG3-myc / +$ . **h**,  
949 **control**:  $y w^{67c23} / Y$ ;  $UAS-mCD8GFP 201Y-GAL4 / +$ . **orion1**:  $y w^{67c23} sn^3 orion^1 FRT19A /$   
950  $Y$ ;  $UAS-mCD8GFP 201Y-GAL4 / +$ . **orion1 + orion-B WT**: see above **(a)**. **orion1 +  $\Delta SP$** : see  
951 above **(d)**. **orion1 + AX3C**: see above **(b)**. **orion1 + CX4C**: see above **(c)**. **orion1 + GAG1**:  
952 see above **(e)**. **orion1 + GAG2**: see above **(f)**. **orion1 + GAG3**: see above **(g)**. **orion-RNAi**:  $y$   
953  $w^{67c23} / Y$ ;  $UAS-mCD8GFP 201Y-GAL4 / UAS-orion-RNAi$ . **orion-RNAi + EcR-B1**:  $y w^{67c23} /$   
954  $Y$ ;  $UAS-mCD8GFP 201Y-GAL4 / UAS-orion-RNAi$ ;  $UAS-EcR-B1 / +$ . **orion-RNAi + control** :  
955  $y w^{67c23} / Y$ ;  $UAS-mCD8GFP 201Y-GAL4 / UAS-orion-RNAi$ ;  $UAS-FRT-y^+-FRT / +$ . **i**, 1 :  $y$   
956  $w^{67c23} sn^3 orion^1 FRT19A / Y$ ;  $UAS-mCD8GFP 201Y-GAL4 / +$ ;  $UAS-orion-A-myc / +$ . 2 :  $y$   
957  $w^{67c23} sn^3 orion^1 FRT19A / Y$ ;  $UAS-mCD8GFP 201Y-GAL4 / +$ ;  $UAS-orion-B-myc / +$ . 3 :  $y$   
958  $w^{67c23} sn^3 orion^1 FRT19A / Y$ ;  $UAS-mCD8GFP 201Y-GAL4 / +$ ;  $UAS-orion-B -\Delta SP-myc / +$ .  
959 4 :  $y w^{67c23} sn^3 orion^1 FRT19A / Y$ ;  $UAS-mCD8GFP 201Y-GAL4 / +$ ;  $UAS-orion-B-Mut AX3C-$   
960  $myc / +$ . 5 :  $y w^{67c23} sn^3 orion^1 FRT19A / Y$ ;  $UAS-mCD8GFP 201Y-GAL4 / +$ ;  $UAS-orion-B-$   
961  $Mut CX4C-myc / +$ . 6 :  $y w^{67c23} sn^3 orion^1 FRT19A / Y$ ;  $UAS-mCD8GFP 201Y-GAL4 / +$ ;  $UAS-$   
962  $orion-B-Mut GAG1-myc / +$ . 7 :  $y w^{67c23} sn^3 orion^1 FRT19A / Y$ ;  $UAS-mCD8GFP 201Y-GAL4$   
963  $/ +$ ;  $UAS-orion-B -Mut GAG2-myc / +$ . 8 :  $y w^{67c23} sn^3 orion^1 FRT19A / Y$ ;  $UAS-mCD8GFP$   
964  $201Y-GAL4 / +$ ;  $UAS-orion-B -Mut GAG3-myc / +$ .

965  
966 **Supplementary Fig. 4: b**,  $y w^* orion^{\Delta A} / Y$ ;  $UAS-mCD8GFP 201Y-GAL4 / +$ . **c**,  $y w^* orion^{\Delta B} /$   
967  $Y$ ;  $UAS-mCD8GFP 201Y-GAL4 / +$ . **d**,  $y w^* orion^{\Delta C} / Y$ ;  $UAS-mCD8GFP 201Y-GAL4 / +$ .

968  
969 **Supplementary Fig. 5: a**,  $y w^{67c23} sn^3 orion^1 FRT19A / Y$ ;  $CyO, P(Dfd-GMR-nvYFP)2 / +$  or  
970  $Sp / +$ ;  $alm-GAL4 UAS-mCD8GFP / +$ . **b**,  $y w^{67c23} sn^3 orion^1 FRT19A / Y$ ;  $CyO, P(Dfd-$   
971  $GMR-nvYFP)2 / +$  or  $Sp / +$ ;  $alm-GAL4 UAS-mCD8GFP / UAS-orion-A-myc$ . **c**,  $y w^{67c23} sn^3$   
972  $orion^1 FRT19A / Y$ ;  $CyO, P(Dfd-GMR-nvYFP)2 / +$  or  $Sp / +$ ;  $alm-GAL4 UAS-mCD8GFP$   
973  $/ UAS-orion-B-myc$ . **d**,  $y w^{67c23} / Y$  or  $y w^{67c23} / w^*$ ;  $UAS-mCD8GFP 201Y-GAL4 / UAS-orion-$   
974  $RNAi$ . **e**,  $w^* / Y$  or  $w^* / w^*$ ;  $UAS-orion-RNAi / +$ ;  $repo-GAL4 UAS-mCD8GFP / +$ .

975

976 **Supplementary Fig. 6: a**,  $w^* tub-P-GAL80 hs-FLP122 FRT19A / y w^{67c23} sn^3 FRT19A ; UAS-$   
977  $mCD8GFP 201Y-GAL4 / +$ . **b**,  $w^* tub-P-GAL80 hs-FLP122 FRT19A / y w^{67c23} sn^3 orion^1$   
978  $FRT19A ; UAS-mCD8GFP 201Y-GAL4 / +$ . **c**,  $y w^{67c23} sn^3 orion^1 FRT19A / Y ; UAS-mCD8GFP$   
979  $201Y-GAL4 / + ; UAS-EcR-B1 / +$ . **d**,  $y w^{67c23} sn^3 FRT19A / Y ; UAS-mCD8GFP 201Y-GAL4 /$   
980  $+$ . **e**,  $y w^{67c23} sn^3 orion^1 FRT19A / Y ; UAS-mCD8GFP 201Y-GAL4 / +$ . **g-i**,  $y w^{67c23} / Y$  or  $y$   
981  $w^{67c23} / y w^{67c23} ; UAS-mCD8GFP 201Y-GAL4 / + ; 2x UAS-drl-myc / +$ . **j-l**,  $y w^{67c23} / Y$  ; or  $y$   
982  $w^{67c23} / y w^* UAS-mCD8GFP 201Y-GAL4 / + ; UAS-orion-B-myc / +$ .

983

984 **Supplementary Fig. 8: a, b, e, f**,  $y w^{67c23} sn^3 FRT19A / Y ; repo-GAL4 UAS-mCD8GFP / +$ .  
985 **c, d, g, h**  $y w^{67c23} sn^3 orion^1 FRT19A / Y ; repo-GAL4 UAS-mCD8GFP / +$ . **i**,  $w^* / Y$  or  $w^* /$   
986  $w^*$  ;  $CyO, P(Dfd-GMR-nvYFP)2 / Sp ; alrm-GAL4 UAS-mCD8GFP / alrm-GAL4 UAS-$   
987  $mCD8GFP$ . **j**, WT :  $y w^{67c23} / Y ; CyO, P(Dfd-GMR-nvYFP)2 / +$  or  $Sp / + ; alrm-GAL4 UAS-$   
988  $mCD8GFP / +$ .  $orion^1$  :  $y w^{67c23} sn^3 orion^1 FRT19A / Y ; CyO, P(Dfd-GMR-nvYFP)2 / +$  or  
989  $Sp / + ; alrm-GAL4 UAS-mCD8GFP / +$ .

990

991 **Supplementary Fig. 9: a-f**,  $y w^{67c23} / Y$  or  $y w^{67c23} / y w^*$  ;  $UAS-mCD8GFP 201Y-GAL4 / + ;$   
992  $UAS-orion-B-myc / +$ .

993

994 **Supplementary Fig. 10: a**,  $y w^{67c23} / Y$  or  $y w^{67c23} / y w^{67c23} ; UAS-mCD8GFP 201Y-GAL4 /$   
995  $CyO$ . **b**,  $y w^{67c23} sn^3 orion^1 FRT19A / Y$  or  $y w^{67c23} sn^3 orion^1 FRT19A / y w^{67c23} sn^3 orion^1$   
996  $FRT19A ; UAS-mCD8GFP 201Y-GAL4 / CyO$ . **d**,  $y w^{67c23} sn^3 FRT19A / Y ; 10X-STAT92E-$   
997  $GFP / +$ . **e**,  $y w^{67c23} sn^3 orion^1 FRT19A / Y ; 10X-STAT92E-GFP / +$ .

998

999

1000

1001

1002

1003
